# Supplementary material for: Chemical Diversity of Mo5S5 Clusters with Pyrazole: Synthesis, Redox and UV-vis-NIR Absorption Properties
Source: MDPI journal article supplement (doi:10.3390/ijms241813879), 2023-09-09
Supplement: s1 [file s1]

# Chemical diversity of Mo<sub>5</sub>S<sub>5</sub> clusters with pyrazole: synthesis, redox and UV-vis-NIR absorption properties

Iulia V. Savina,<sup>1</sup> Anton A. Ivanov,<sup>1</sup> Ilia V. Eltsov,<sup>2</sup> Vadim V. Yanshole,<sup>2,3</sup> Natalia V. Kuratieva,<sup>1</sup> Andrey Y. Komarovskikh,<sup>1</sup> Mikhail M. Syrokvashin,<sup>1</sup> and Michael A. Shestopalov<sup>1,\*</sup>

<sup>1</sup> Nikolaev Institute of Inorganic Chemistry of Siberian Branch of Russian Academy of Sciences, 3 Acad. Lavrentiev ave., 630090, Novosibirsk, Russia; savina@niic.nsc.ru (I.V.S.); ivanov338@niic.nsc.ru (A.A.I); kuratieva@gmail.com (N.V.K); komarovskikh@niic.nsc.ru (A.Y.K.); syrokvashin@niic.nsc.ru (M.M.S.); shtopy@niic.nsc.ru (M.A.S.)

<sup>2</sup> Novosibirsk State University, 1 Pirogova st., 630090, Novosibirsk, Russia; eiv@fen.nsu.ru (I.V.E.); Vadim.Yanshole@tomo.nsc.ru (V.V.Y.)

<sup>3</sup> International Tomography Center SB RAS, 3a Institutskaya Str., 630090 Novosibirsk, Russia; Vadim.Yanshole@tomo.nsc.ru (V.V.Y.)

\* Correspondence: shtopy@niic.nsc.ru (M.A.S.)

## TABLE OF CONTENT

|                                                                    |    |
|--------------------------------------------------------------------|----|
| NMR spectroscopy data for [1 <sup>ox</sup> ]Br <sub>2</sub> .....  | 3  |
| Mass-spectrometry data for [1 <sup>ox</sup> ]Br <sub>2</sub> ..... | 6  |
| NMR spectroscopy data for [2]Br .....                              | 7  |
| NMR spectroscopy data for [3]Br <sub>2</sub> .....                 | 10 |
| Mass-spectrometry data for [2]Br and [3]Br <sub>2</sub> .....      | 11 |
| NMR spectroscopy data for [4]Br .....                              | 12 |
| Mass-spectrometry data for [4]Br .....                             | 16 |
| Packing in the crystal structures .....                            | 17 |
| EPR and DFT calculations data for [1 <sup>red</sup> ]Br .....      | 28 |
| Cyclic voltammetry data.....                                       | 29 |
| DFT calculations data.....                                         | 34 |
| UV-vis-NIR absorption data.....                                    | 35 |
| IR spectra .....                                                   | 36 |
| Thermogravimetric analysis.....                                    | 37 |
| X-ray powder diffraction analysis of reaction mixture .....        | 39 |
| Crystal structure data .....                                       | 40 |

## NMR spectroscopy data for $[1^{ox}]Br_2$

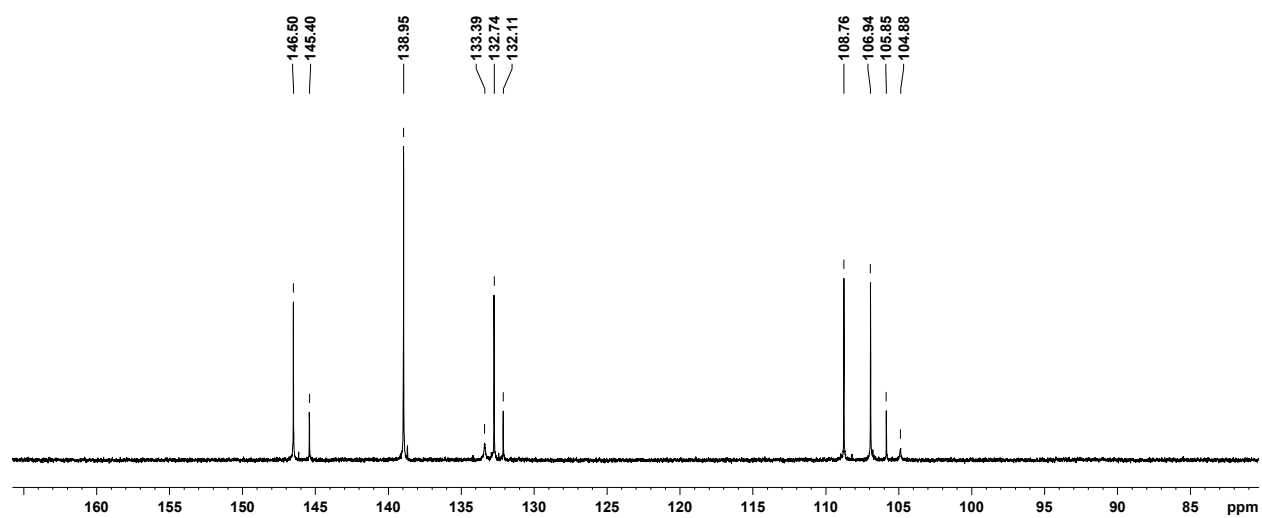

Figure S1.  $^{13}C$  NMR spectrum of  $[1^{ox}]Br_2$  in  $CD_3OD$ .

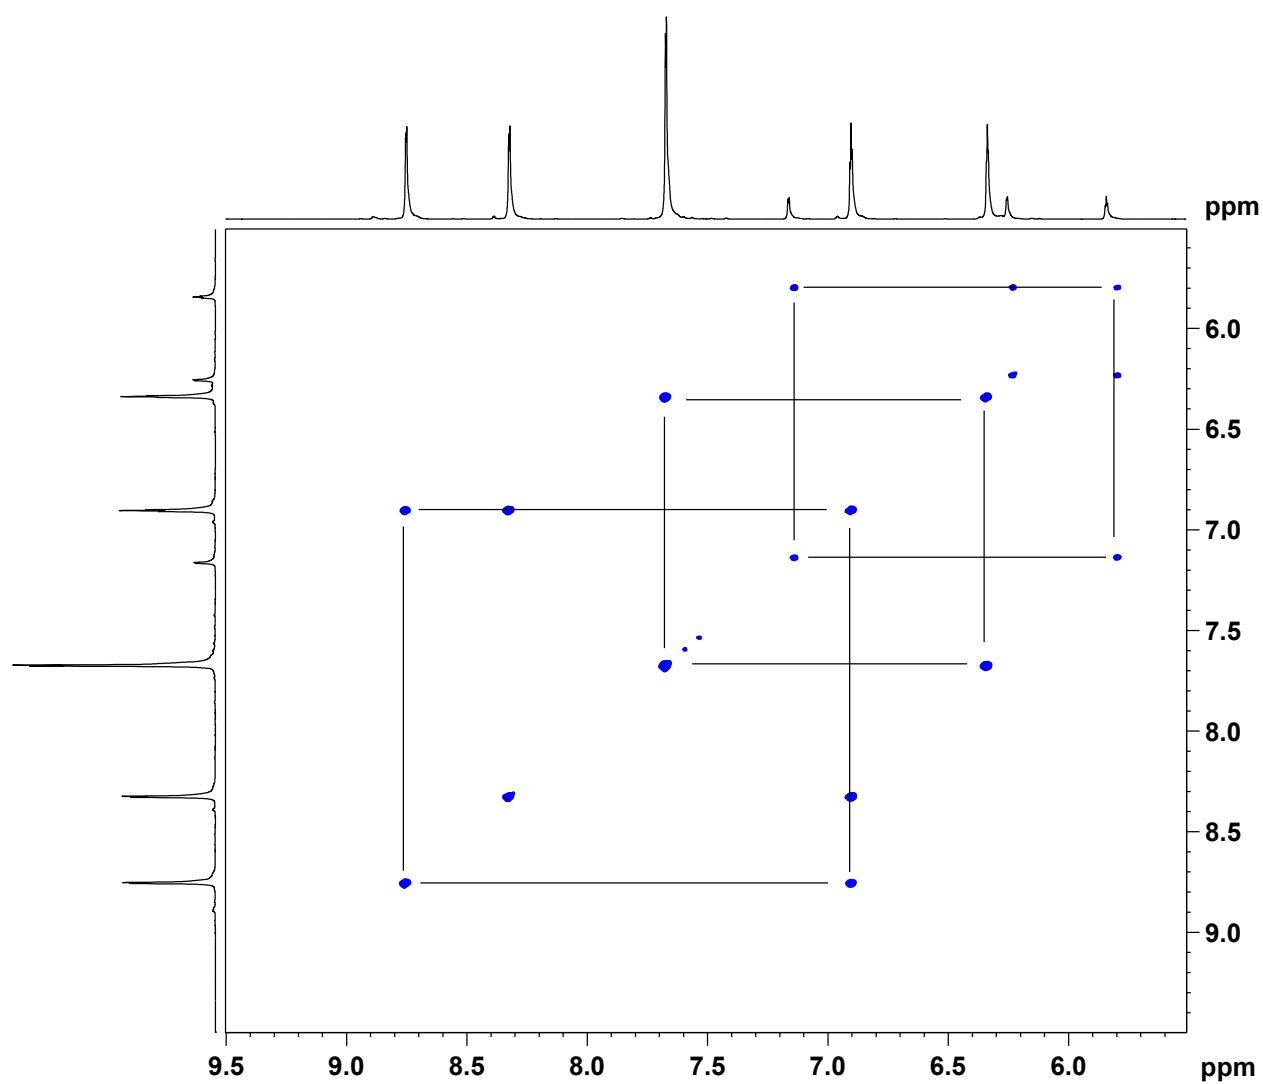

Figure S2.  $^1H$ ,  $^1H$ -NMR correlation spectra of  $[1^{ox}]Br_2$  in  $CD_3OD$ .

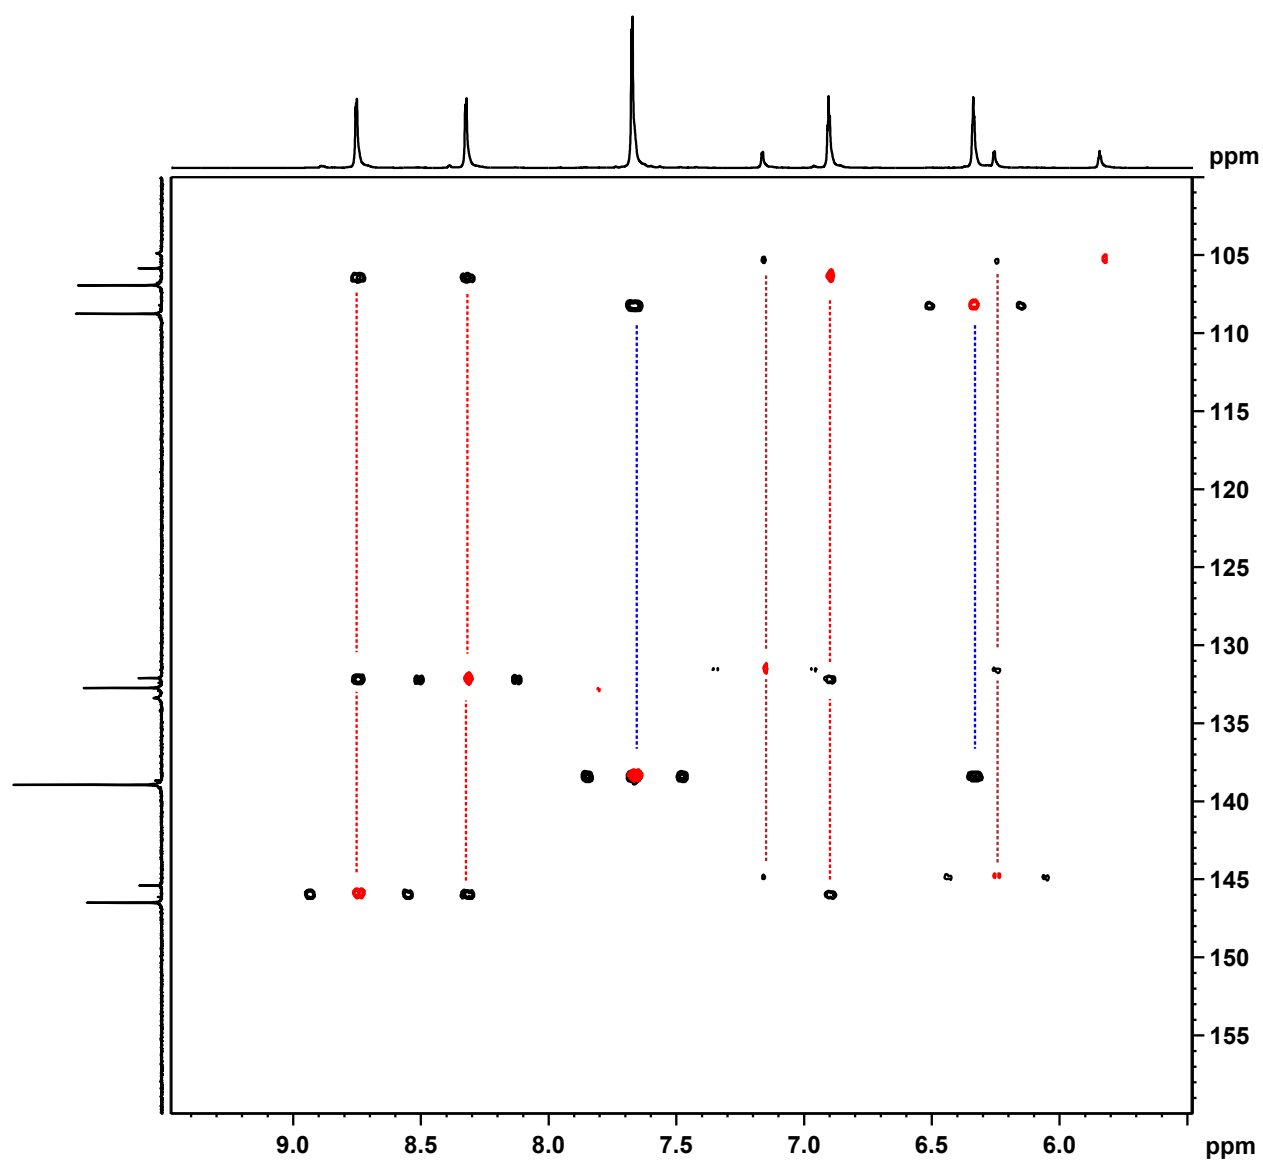

**Figure S3.**  $^1H$ ,  $^{13}C$ -NMR correlation spectra (HMBC – black, HSQC – red) of  $[1^{ox}]Br_2$  in  $CD_3OD$ .

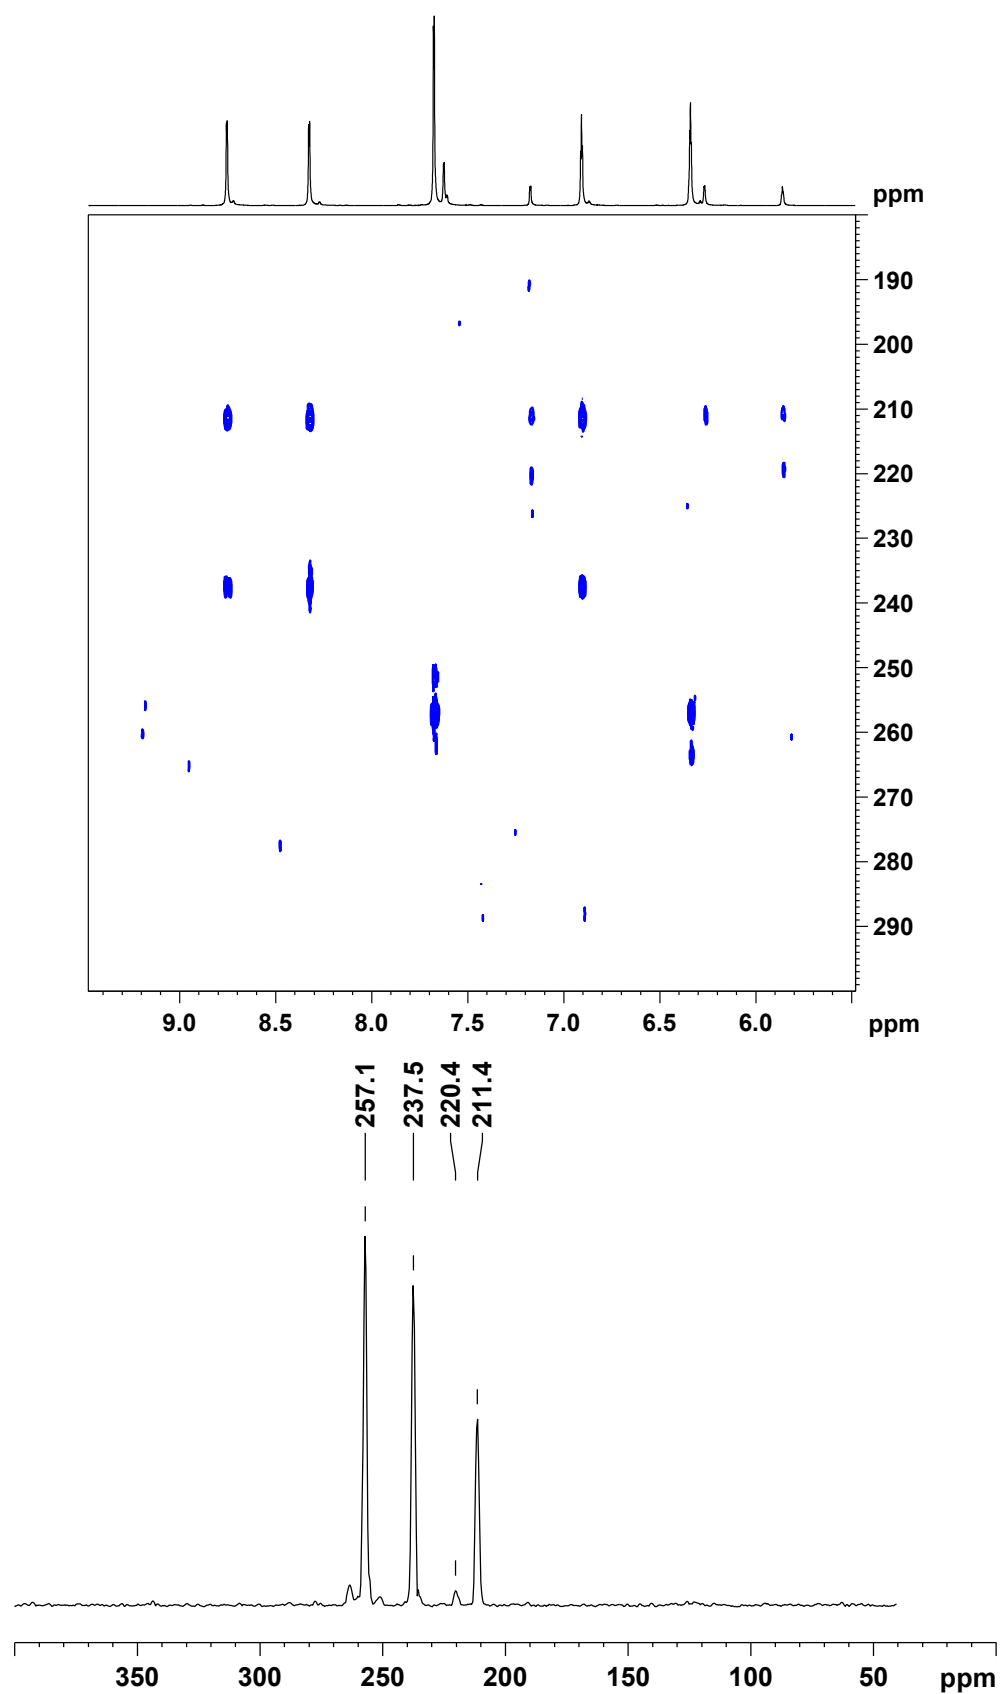

**Figure S4.**  $^1\text{H}$ - $^{15}\text{N}$  HMBC NMR spectra (top) and  $^{15}\text{N}$ -axis projection (bottom) of  $[\mathbf{1}^{\text{ox}}]\text{Br}_2$  in  $\text{CD}_3\text{OD}$ .

## Mass-spectrometry data for $[1^{\text{ox}}]\text{Br}_2$

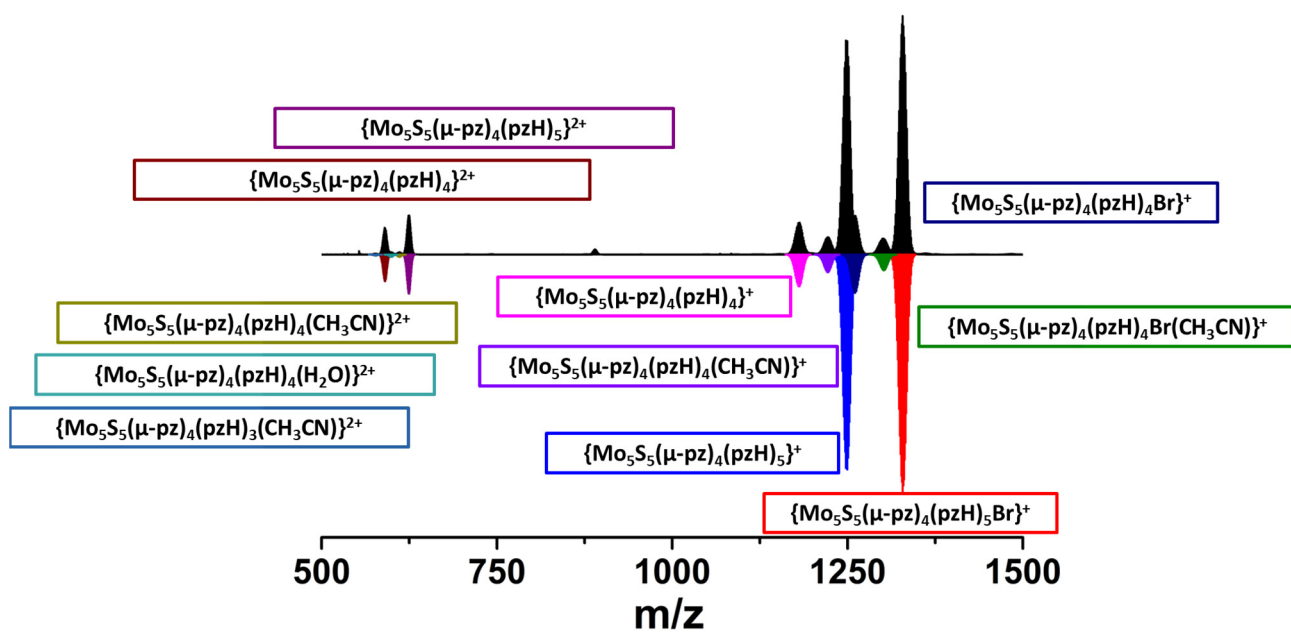

**Figure S5.** HR-ESI-MS spectrum of solution of  $[1^{\text{ox}}]\text{Br}_2$  in acetonitrile (black) and simulations of cluster forms (colored).

## NMR spectroscopy data for [2]Br

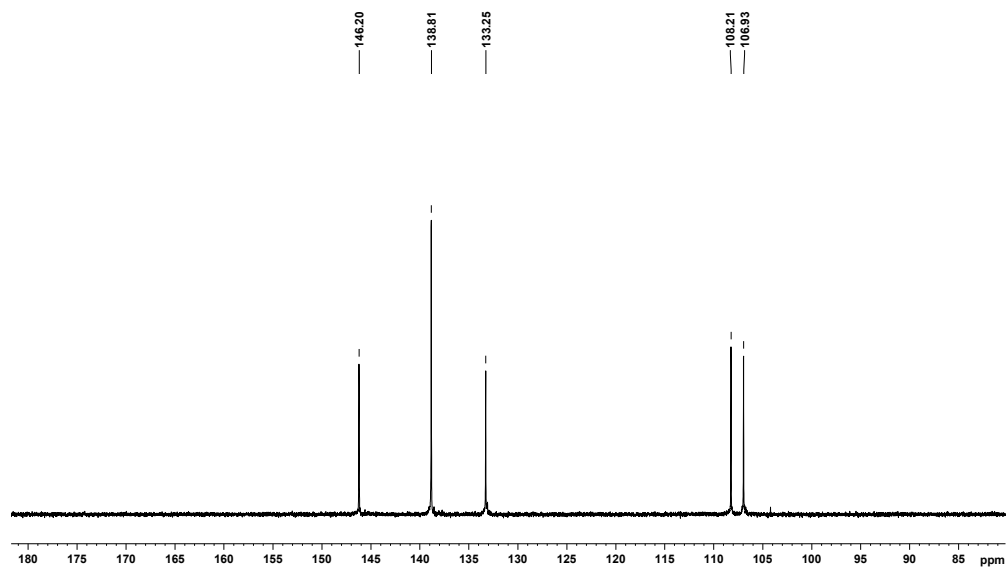

Figure S6.  $^{13}\text{C}$  NMR spectrum of [2]Br in DMSO- $\text{d}_6$ .

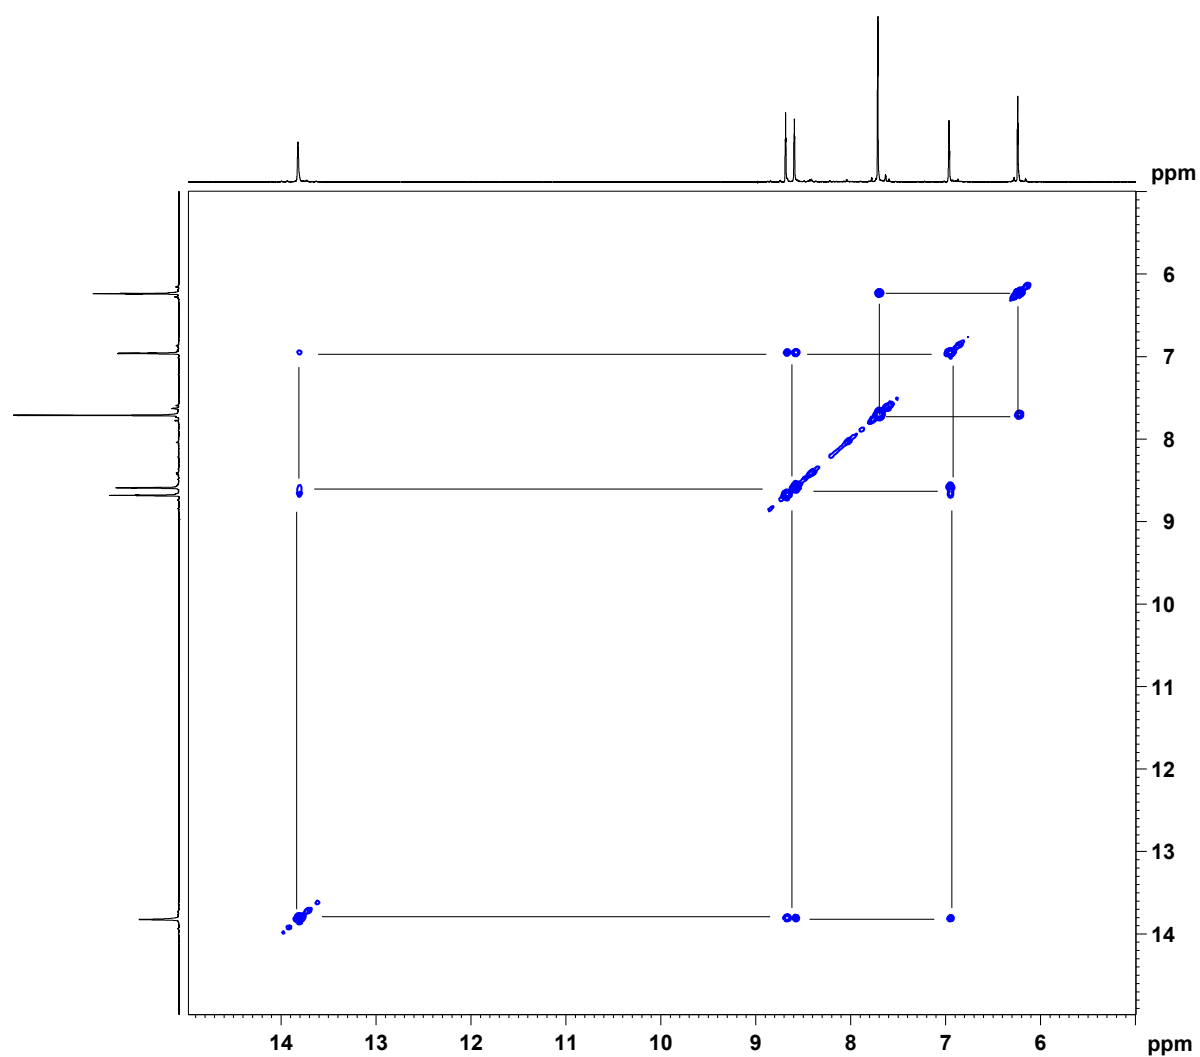

Figure S7.  $^1\text{H}$ ,  $^1\text{H}$ -NMR correlation spectra of [2]Br in DMSO- $\text{d}_6$ .

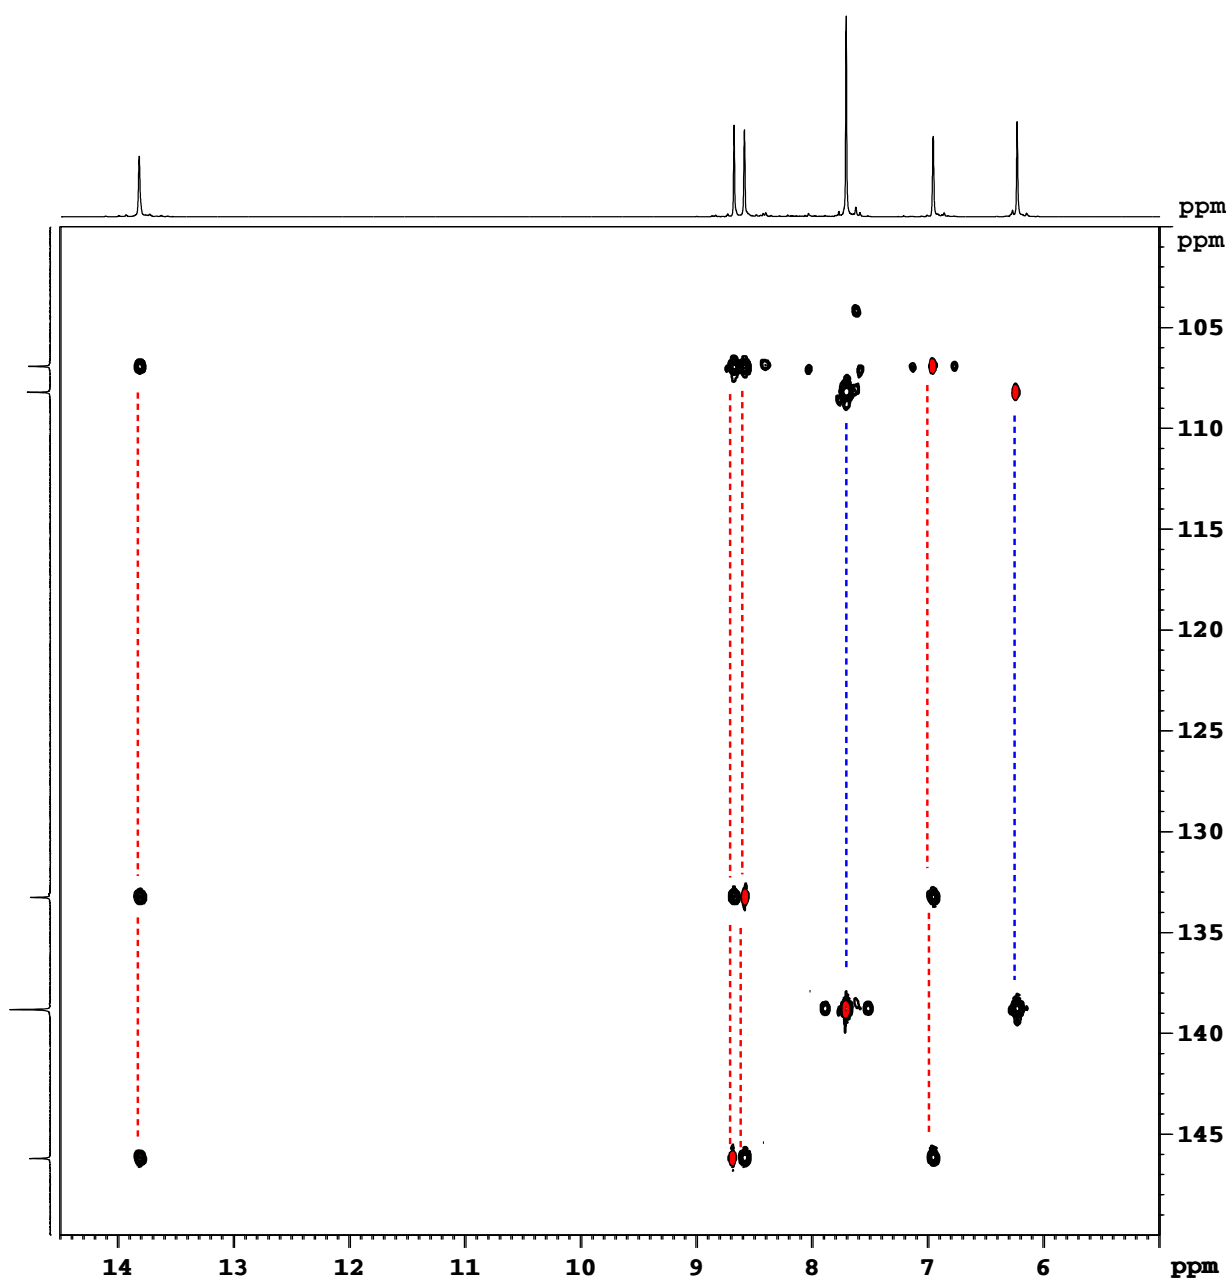

**Figure S8.** <sup>1</sup>H, <sup>13</sup>C-NMR correlation spectra (HMBC – black, HSQC – red) of [2]Br in DMSO-d<sub>6</sub>.

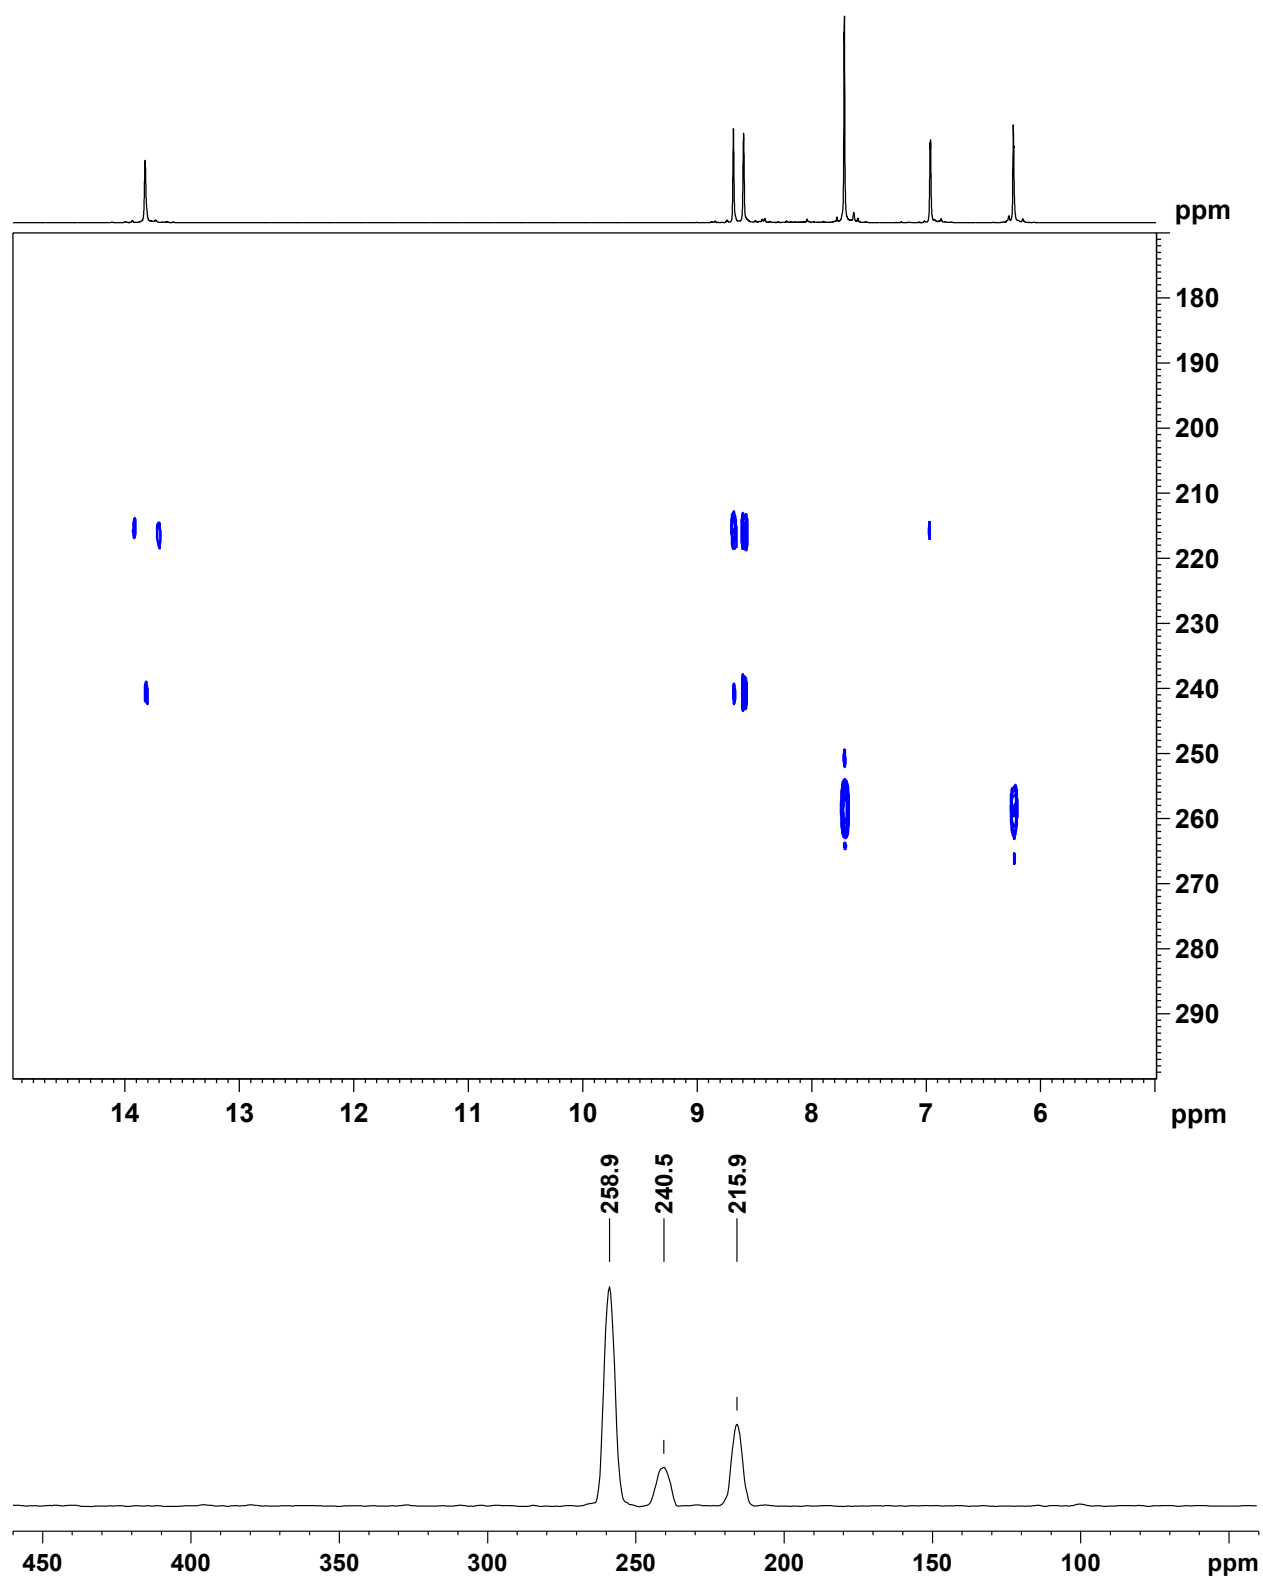

**Figure S9.** <sup>1</sup>H-<sup>15</sup>N HMBC NMR spectra (top) and <sup>15</sup>N-axis projection (bottom) of [2]Br in DMSO-d<sub>6</sub>.

## NMR spectroscopy data for [3]Br<sub>2</sub>

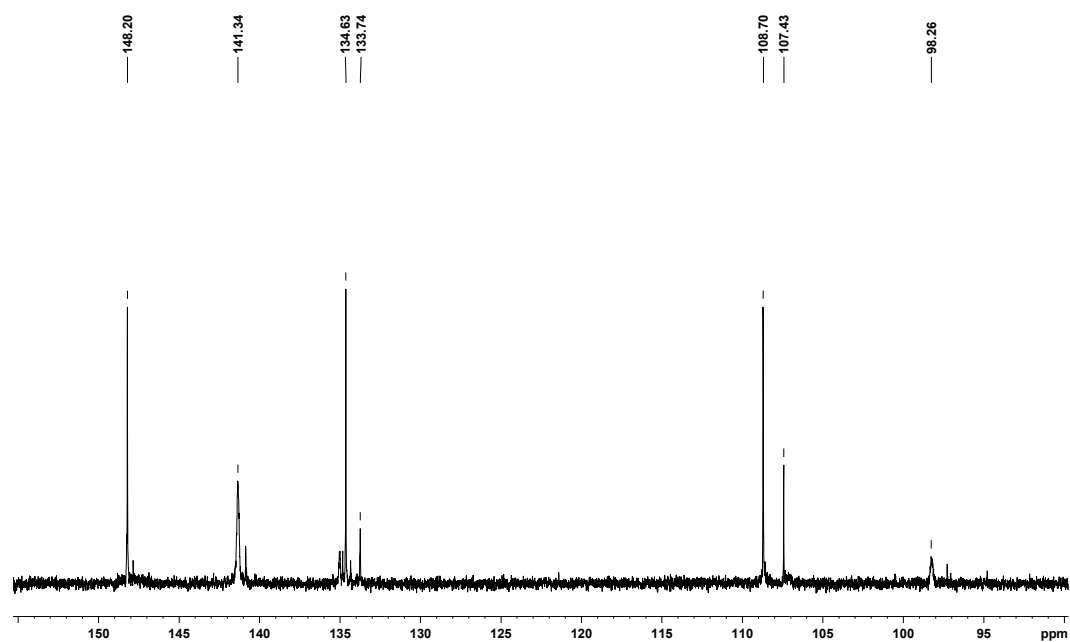

Figure S10. <sup>13</sup>C NMR spectrum of [3]Br<sub>2</sub> in CD<sub>3</sub>OD.

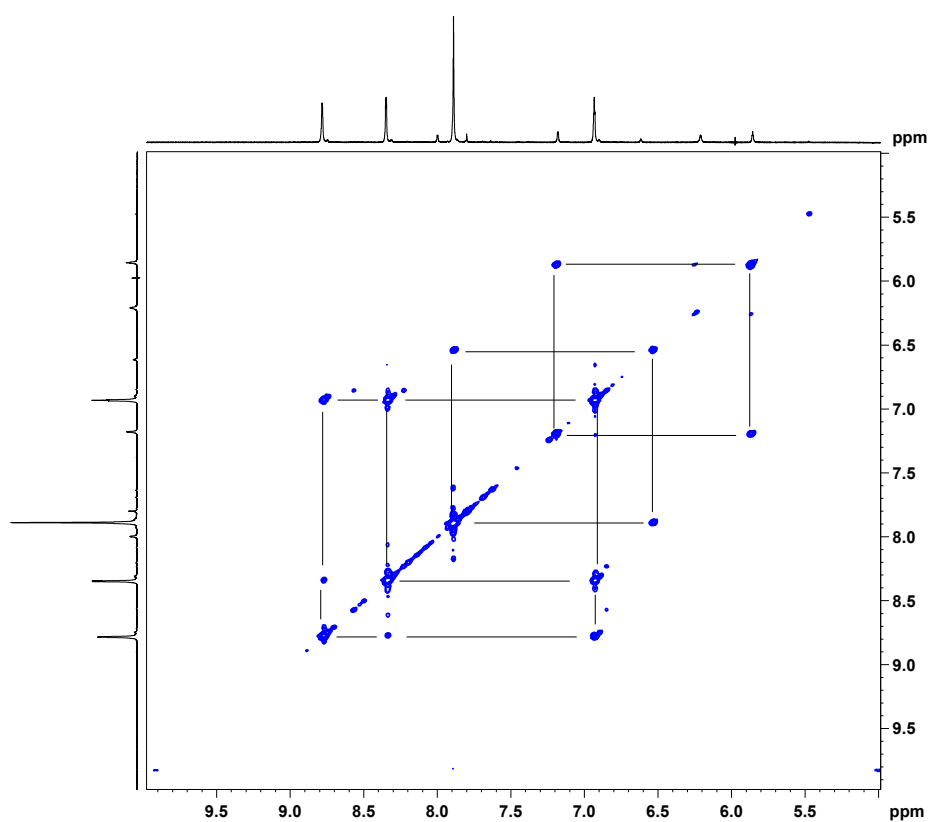

Figure S11. <sup>1</sup>H, <sup>1</sup>H-NMR correlation spectra of [3]Br<sub>2</sub> in CD<sub>3</sub>OD.

## Mass-spectrometry data for [2]Br and [3]Br<sub>2</sub>

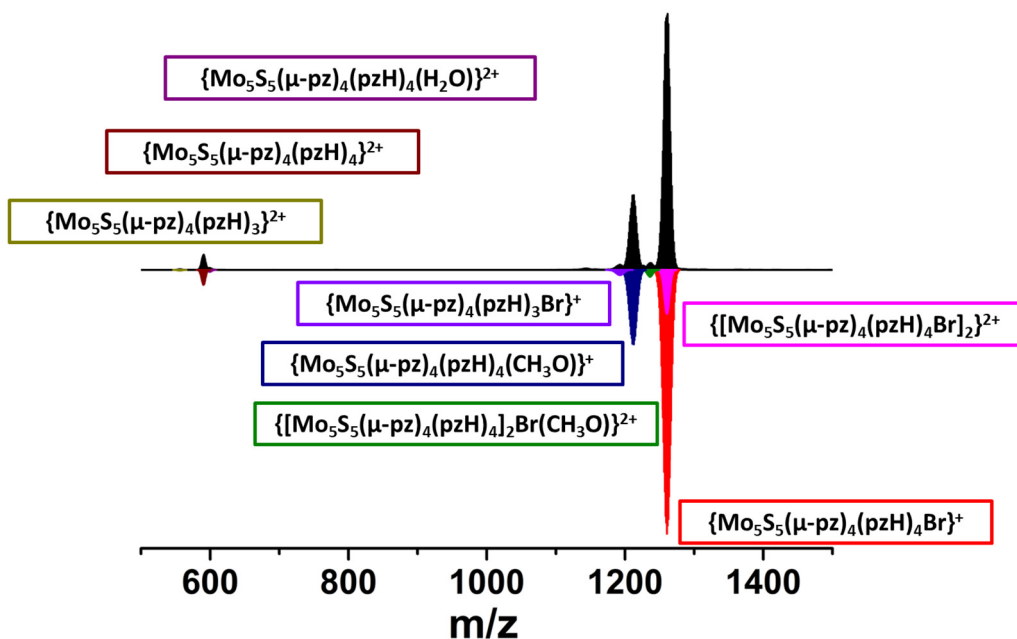

**Figure S12.** HR-ESI-MS spectrum of solution of [2]Br in methanol (black) and simulations of cluster forms (colored).

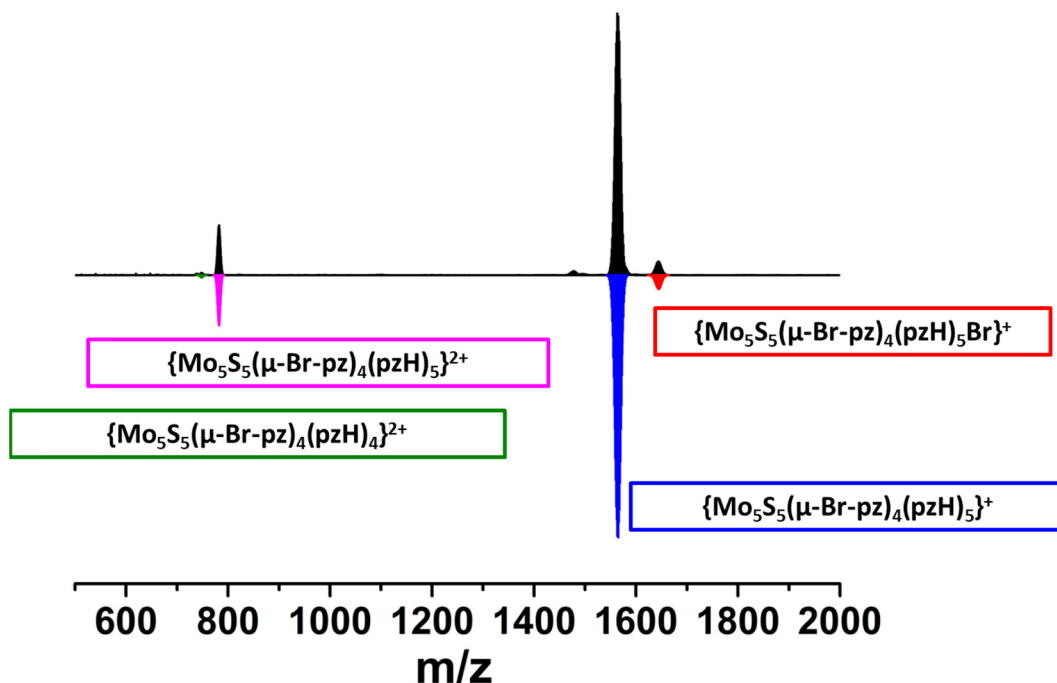

**Figure S13.** HR-ESI-MS spectrum of solution of [3]Br<sub>2</sub> in dichloromethane (black) and simulations of cluster forms (colored).

## NMR spectroscopy data for [4]Br

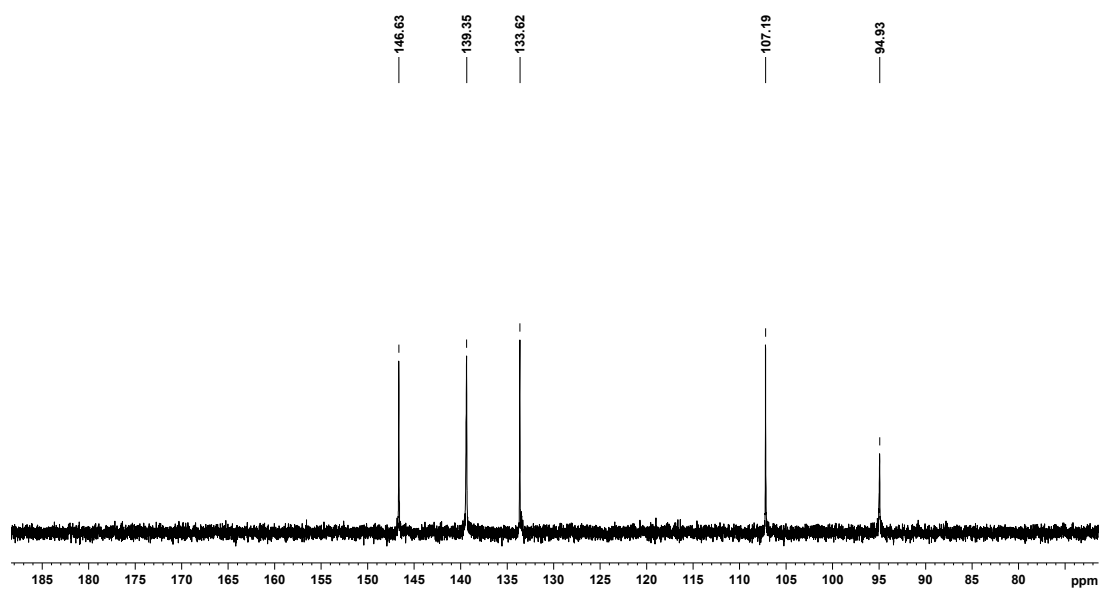

Figure S14. <sup>13</sup>C NMR spectrum of [4]Br in DMSO-d<sub>6</sub>.

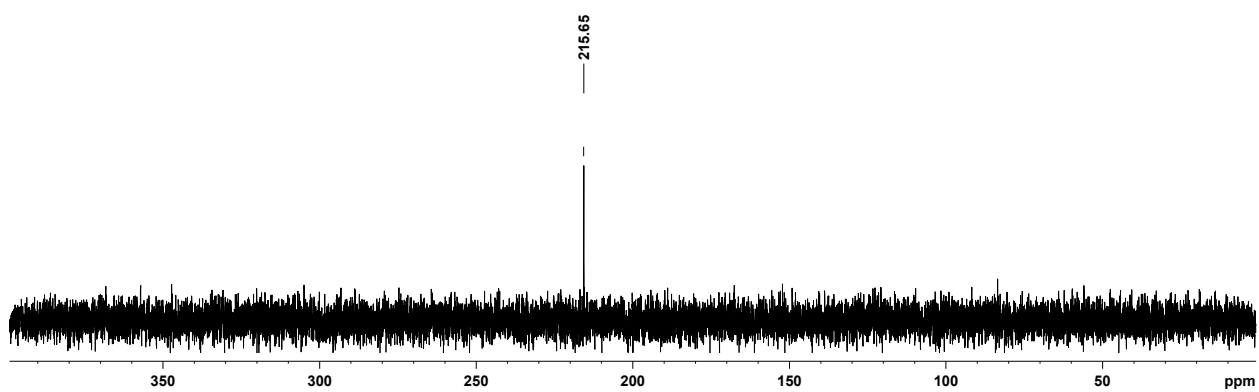

Figure S15. <sup>15</sup>N NMR spectrum of [4]Br in DMSO-d<sub>6</sub>.

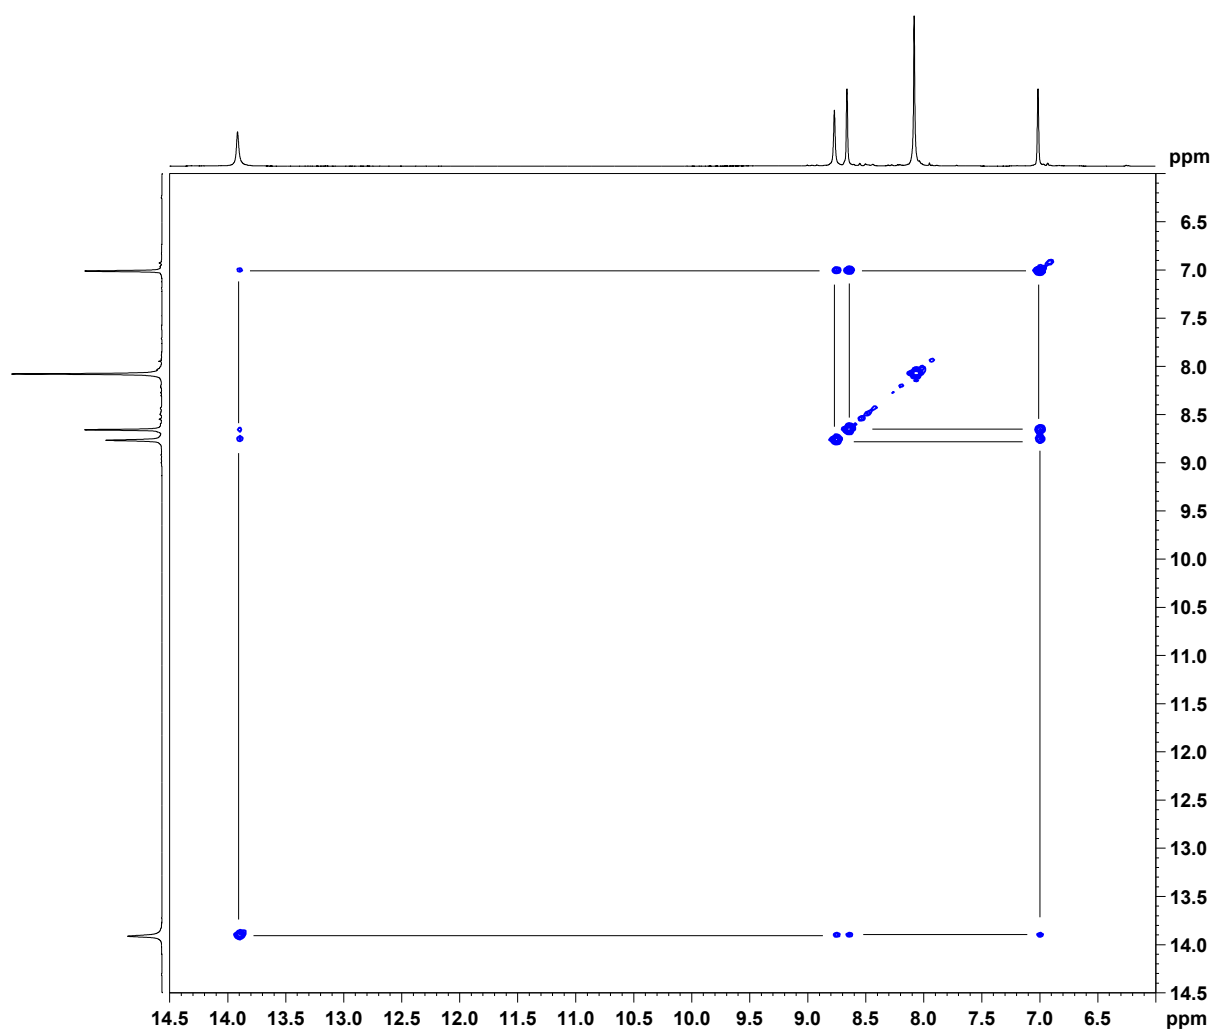

**Figure S16.**  $^1\text{H}, ^1\text{H}$ -NMR correlation spectra of **[4]Br** in  $\text{DMSO-d}_6$ .

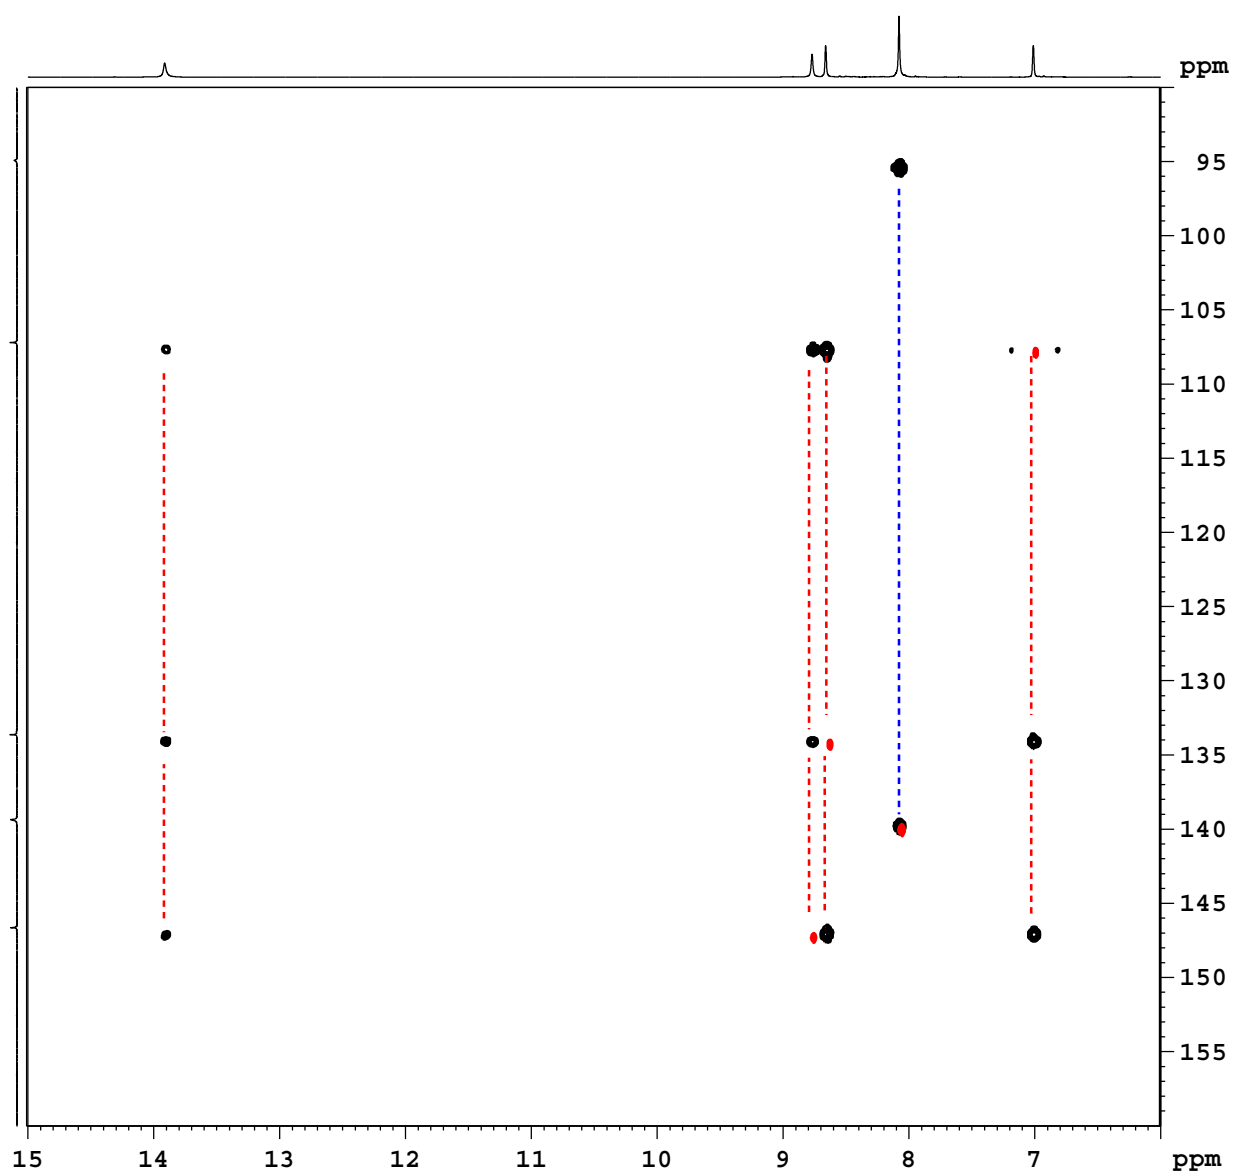

**Figure S17.** <sup>1</sup>H,<sup>13</sup>C-NMR correlation spectra (HMBC – black, HSQC – red) of [4]Br in DMSO-d<sub>6</sub>.

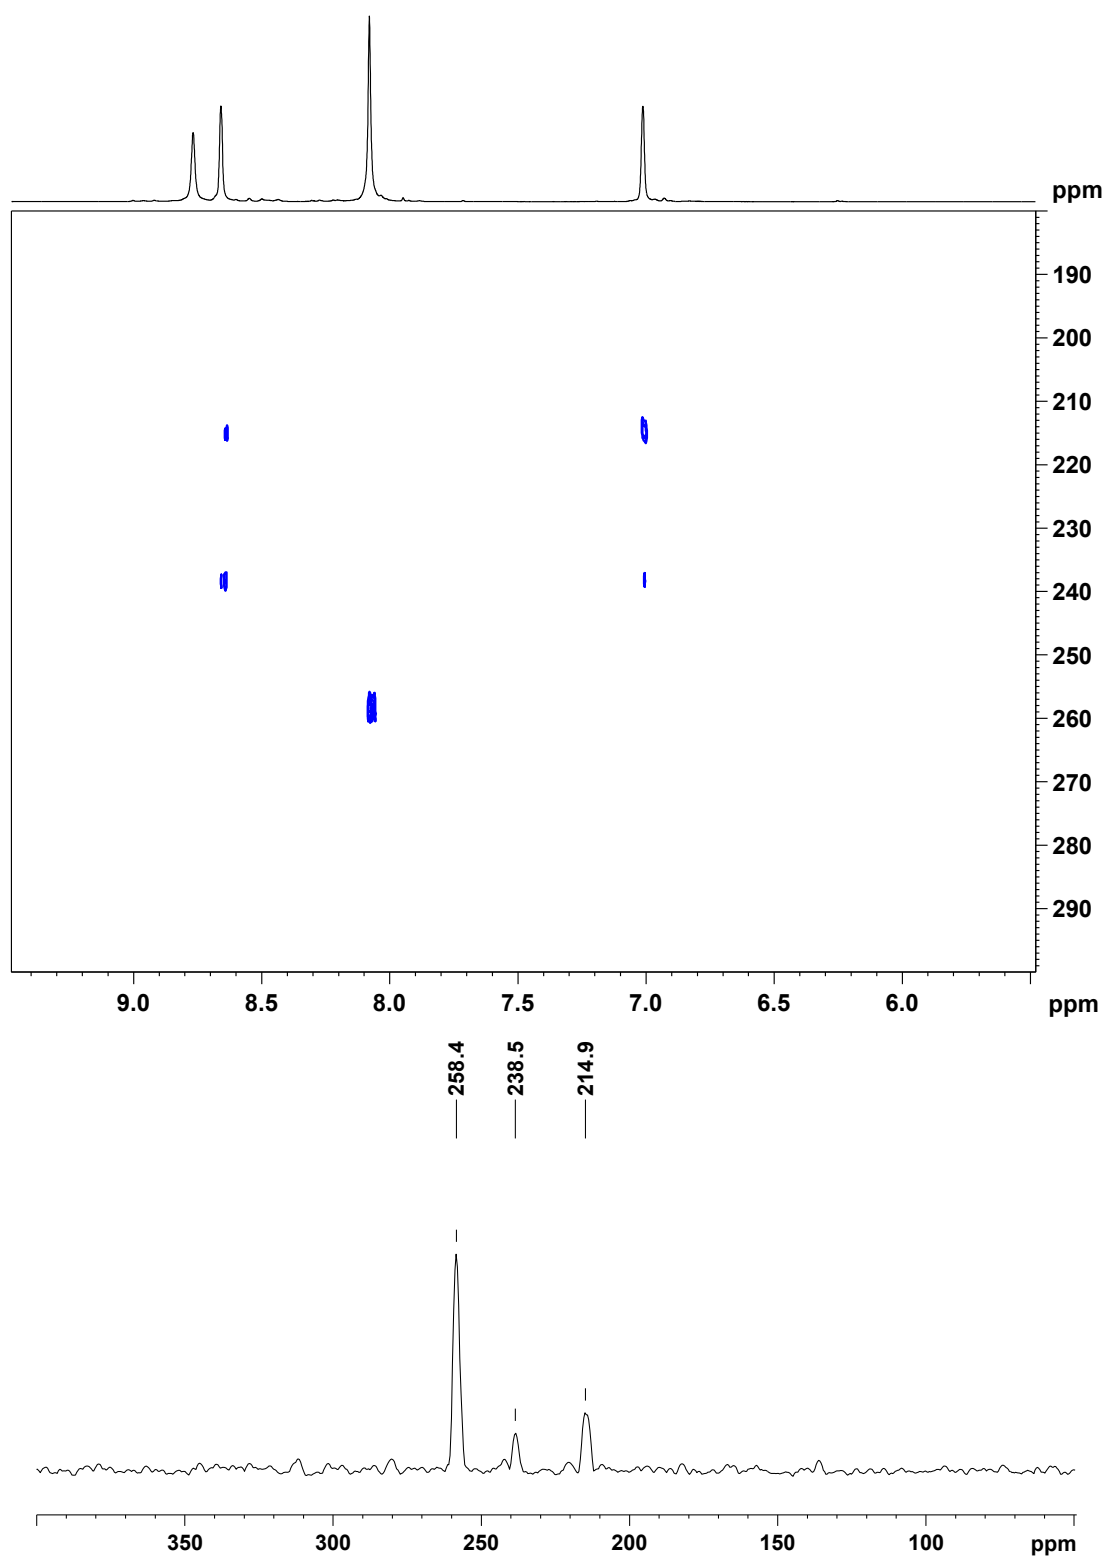

**Figure S18.** <sup>1</sup>H-<sup>15</sup>N HMBC NMR spectra (top) and <sup>15</sup>N-axis projection (bottom) of [4]Br in DMSO-d<sub>6</sub>.

## Mass-spectrometry data for [4]Br

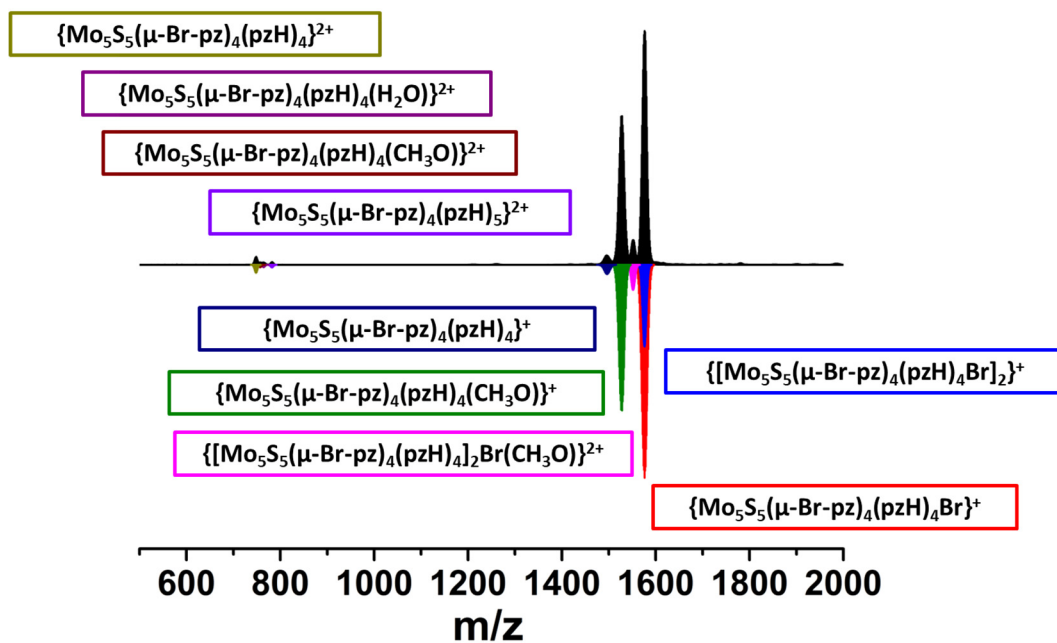

**Figure S19.** HR-ESI-MS spectrum of solution of [4]Br in acetonitrile (black) and simulations of cluster forms (colored).

## Packing in the crystal structures

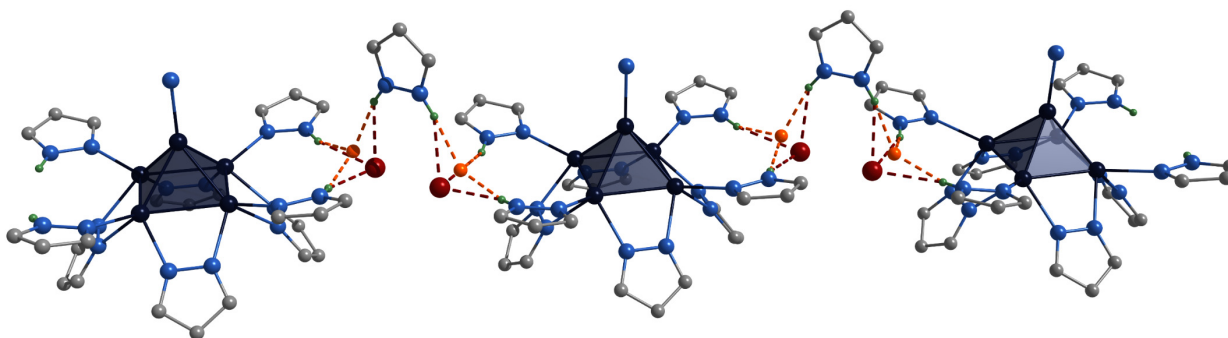

**Figure S20.** Packing in the crystal structure of  $[1^{\text{red}}]\text{Br}$ : hydrogen bonds between terminal pyrazole ligands, Br/O and solvate pyrazole molecules forming infinite chains. Color code: Mo – dark blue, C – gray, N – blue, Br – red, O – orange, H – green, N-H $\cdots$ Br – red, N-H $\cdots$ O – orange. Hydrogen and sulfur atoms are omitted for clarity.

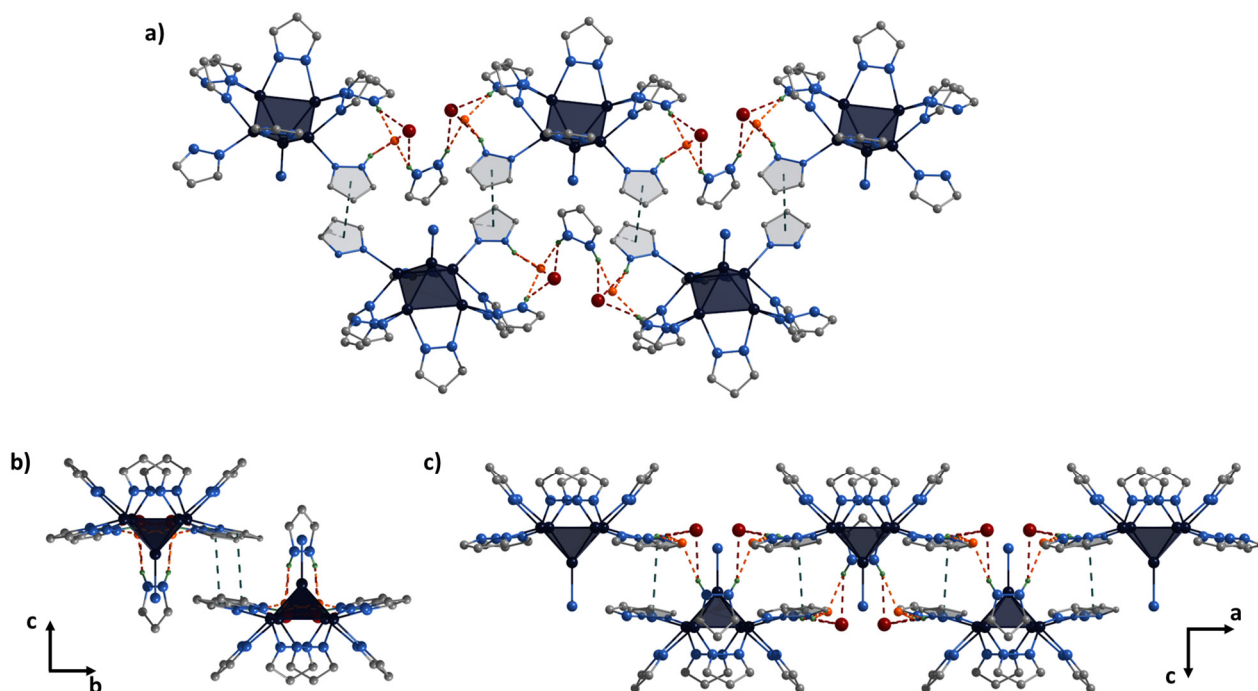

**Figure S21.** Packing in the crystal structure of  $[1^{\text{red}}]\text{Br}$ . a) Side view on the packing of the chains by  $\pi$ - $\pi$  stacking interactions forming infinite layers. b) View on the layer along  $a$  axis. c) View on the layer along  $b$  axis. Color code: Mo – dark blue, C – gray, N – blue, Br – red, O – orange, H – green, N-H $\cdots$ Br – red, N-H $\cdots$ O – orange,  $\pi$ - $\pi$  stacking – green. Hydrogen and sulfur atoms are omitted for clarity.

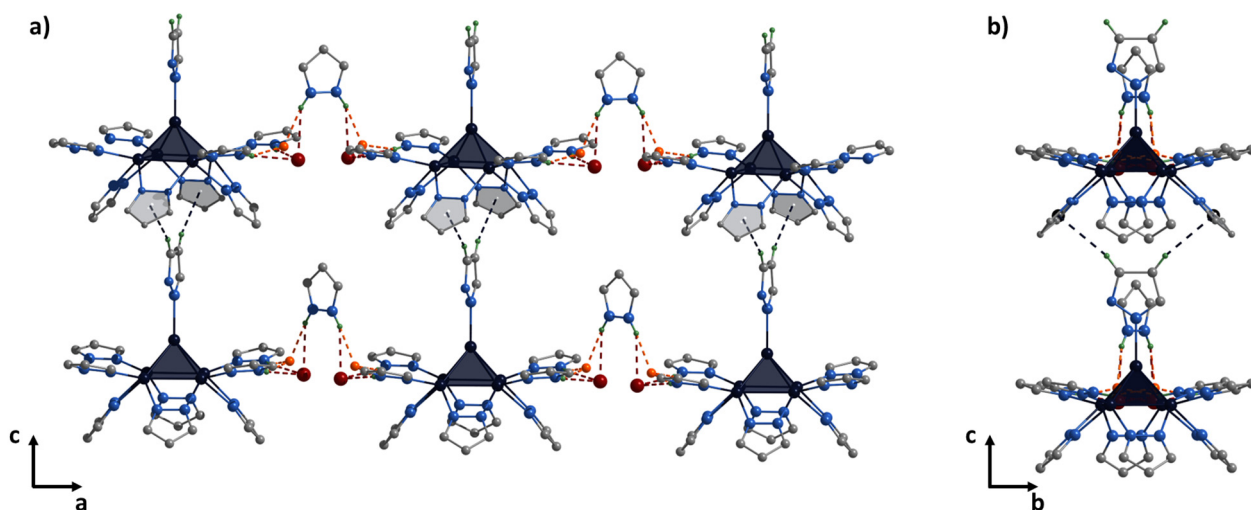

**Figure S22.** Packing in the crystal structure of  $[1^{\text{red}}]\text{Br}$ . a) Packing of the layers by C-H- $\pi$  stacking interactions: view along  $b$  axis (a) and  $a$  axis (b). Color code: Mo – dark blue, C – gray, N – blue, Br – red, O – orange, H – green, N-H $\cdots$ Br – red, N-H $\cdots$ O – orange, C-H- $\pi$  stacking – black. Hydrogen and sulfur atoms are omitted for clarity.

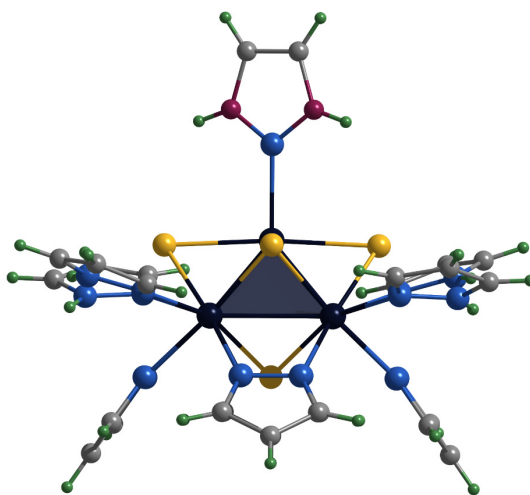

**Figure S23.** Crystal structure of cationic cluster  $[\{\text{Mo}_5(\mu_3\text{-S})_4(\mu_4\text{-S})(\mu\text{-pz})_4\}(\text{pzH})_5]^{2+}$ , side view. Color code:  $\text{Mo}_5$  – dark blue square pyramid, S – yellow, N – blue, C – grey, H – green, disordered C/N – purple.

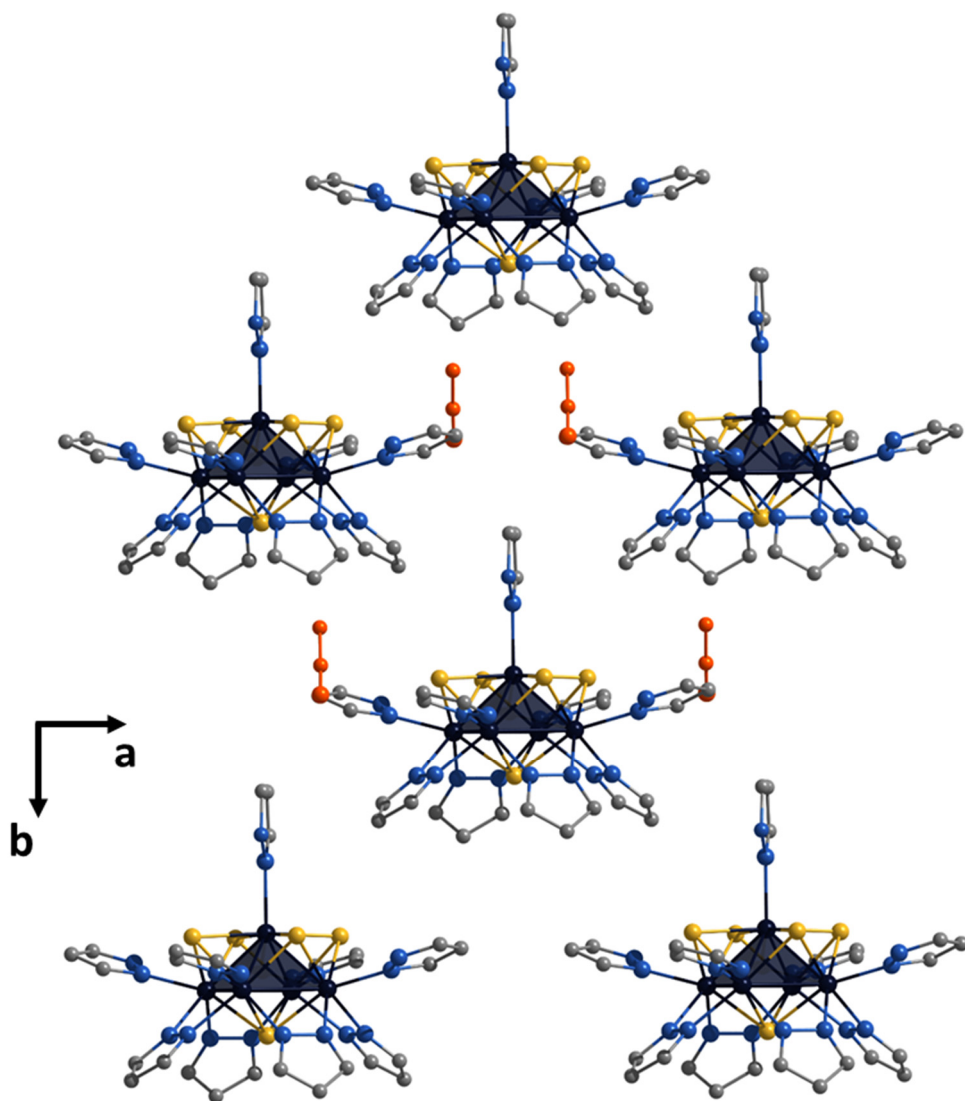

**Figure S24.** Packing of the clusters and solvate acetonitrile molecules along *ab* plane in the crystal structure of  $[1^{ox}][\text{Mo}_6\text{I}_{14}]$  forming infinite layers. Color code: Mo – dark blue, C – gray, N – blue, S – yellow,  $\text{CH}_3\text{CN}$  – orange. Hydrogen atoms are omitted for clarity.

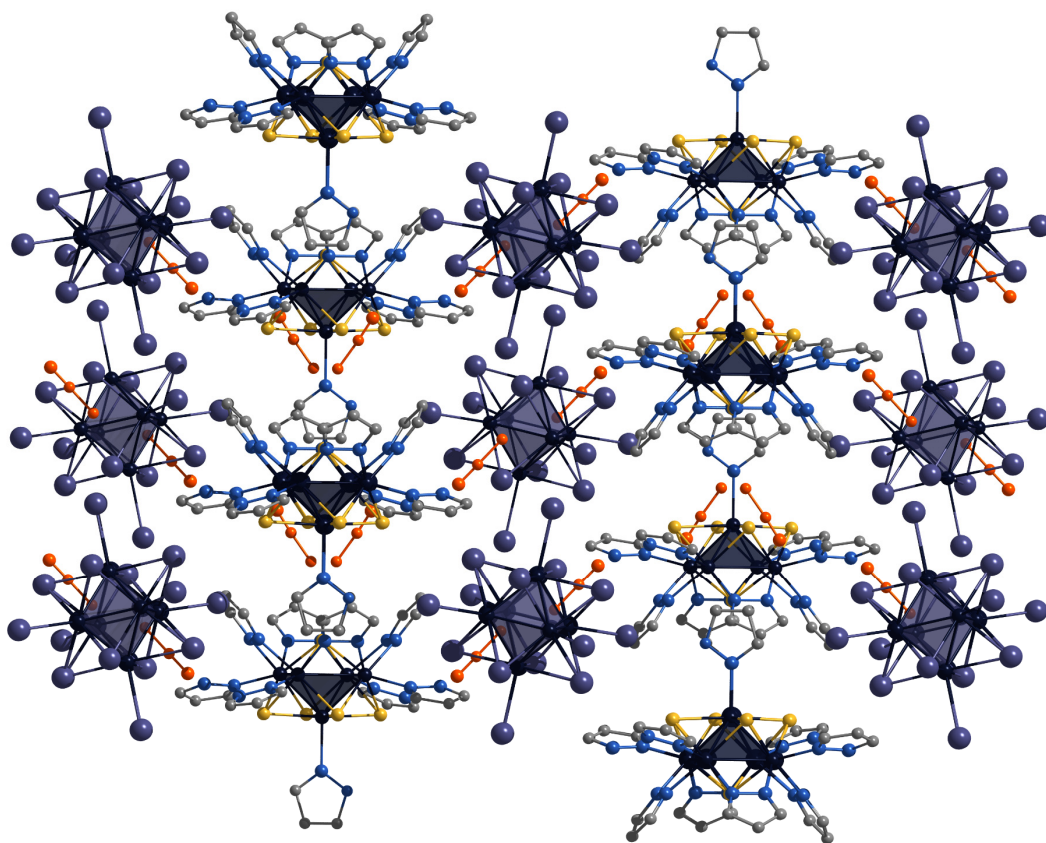

**Figure S25.** Packing of the layers in the crystal structure of  $[1^{ox}][Mo_6I_{14}]$ . Color code: Mo – dark blue, C – gray, N – blue, S – yellow, I – purple,  $CH_3CN$  – orange. Hydrogen atoms are omitted for clarity.

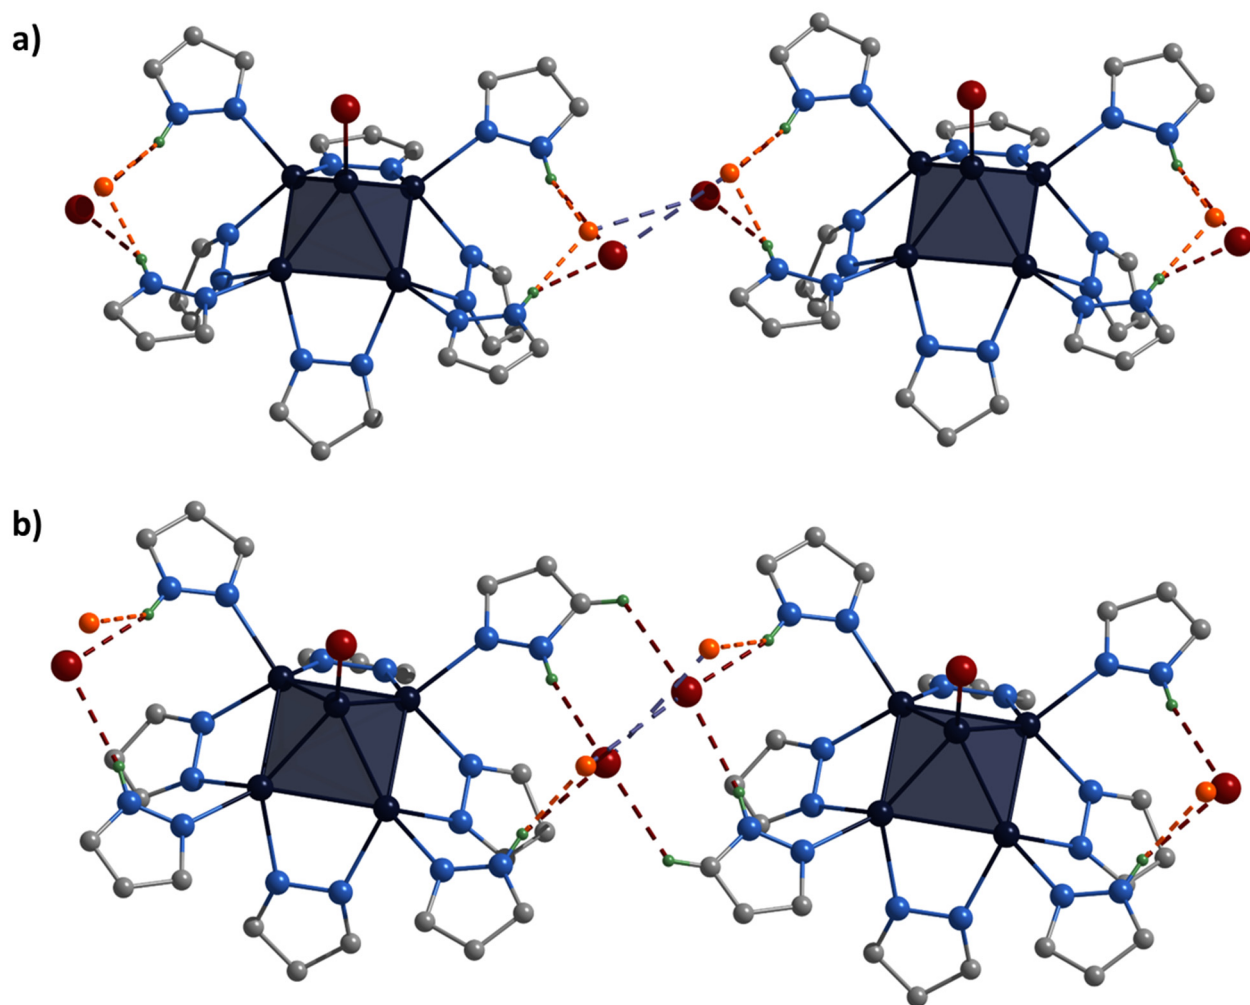

**Figure S26.** Packing in the crystal structure of **[2]Br·2.5H<sub>2</sub>O·0.5DMF**. Chains formed by hydrogen bonds between basal pyrazole ligands and Br-anions or solvate water molecules along *a* (a) or *c* axis (b). Color code: Mo – dark blue, C – gray, N – blue, Br – red, O – orange, H – green, N-H···Br – red, N-H···O – orange, Br···O – violet. Hydrogen and sulfur atoms are omitted for clarity.

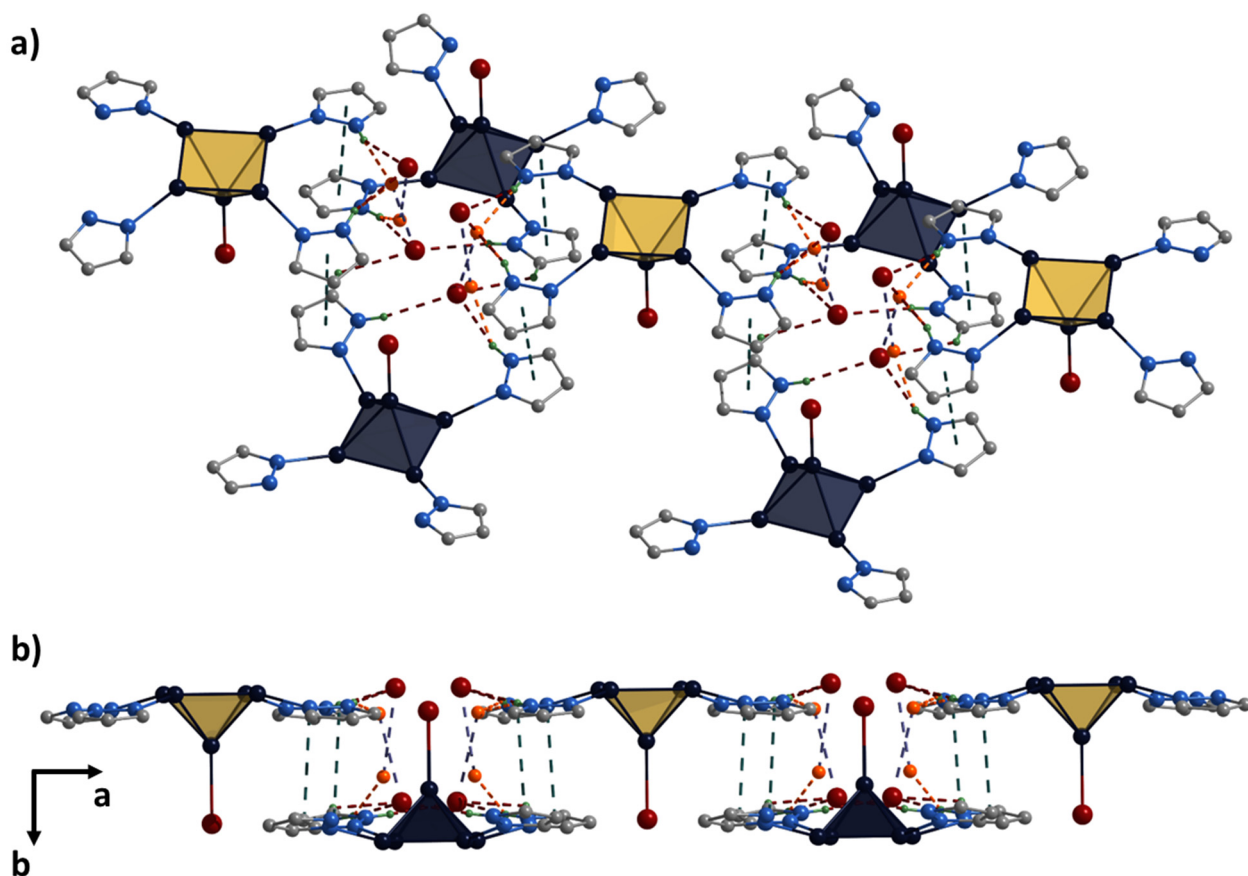

**Figure S27.** Packing in the crystal structure of  $[2]\text{Br} \cdot 2.5\text{H}_2\text{O} \cdot 0.5\text{DMF}$ . Packing of the chains by  $\pi$ - $\pi$  stacking interactions between basal pyrazole ligands: side view  $a$  (a) and view along  $c$  axis (b). Color code: Mo – dark blue, C – gray, N – blue, Br – red, O – orange, H – green, N-H $\cdots$ Br – red, N-H $\cdots$ O – orange, Br $\cdots$ O – violet,  $\pi$ - $\pi$  stacking – green. Different colors of the square pyramids indicate that the clusters belong to different chains. Hydrogen and sulfur atoms are omitted for clarity.

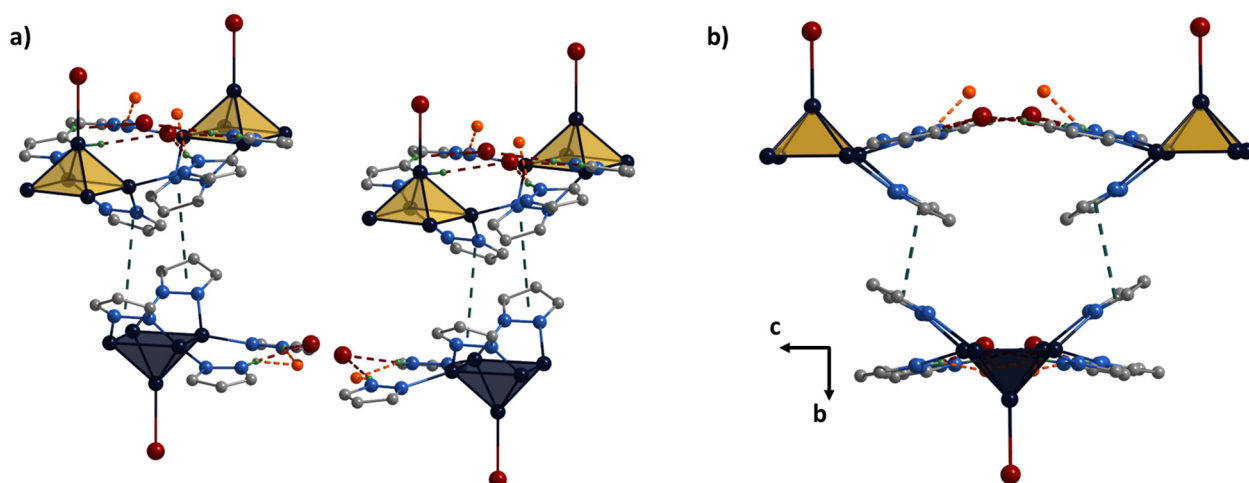

**Figure S28.** Packing in the crystal structure of  $[2]\text{Br} \cdot 2.5\text{H}_2\text{O} \cdot 0.5\text{DMF}$ . Packing of the chains by  $\pi$ - $\pi$  stacking interactions between pyrazolate ligands: side view  $a$  (a) and view along  $a$  axis (b). Color code: Mo – dark blue, C – gray, N – blue, Br – red, O – orange, H – green, N-H $\cdots$ Br – red, N-H $\cdots$ O – orange, Br $\cdots$ O – violet,  $\pi$ - $\pi$  stacking – green. Different colors of the square pyramids indicate that the clusters belong to different chains. Hydrogen and sulfur atoms are omitted for clarity.

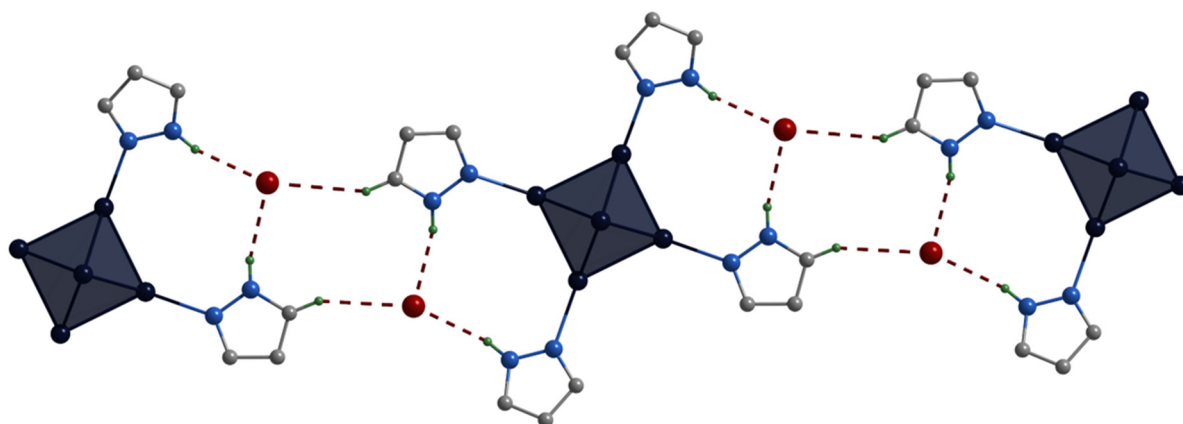

**Figure S29.** Packing in the crystal structure of  $[3]\text{Br}_2 \cdot \text{CH}_3\text{CN} \cdot \text{Et}_2\text{O}$ . Hydrogen bonds formed between basal pyrazole ligands and Br-anions forming infinite chains. Color code: Mo – dark blue, C – gray, N – blue, Br – red, H – green, N-H $\cdots$ Br / C-H $\cdots$ Br – red. Hydrogen and sulfur atoms are omitted for clarity.

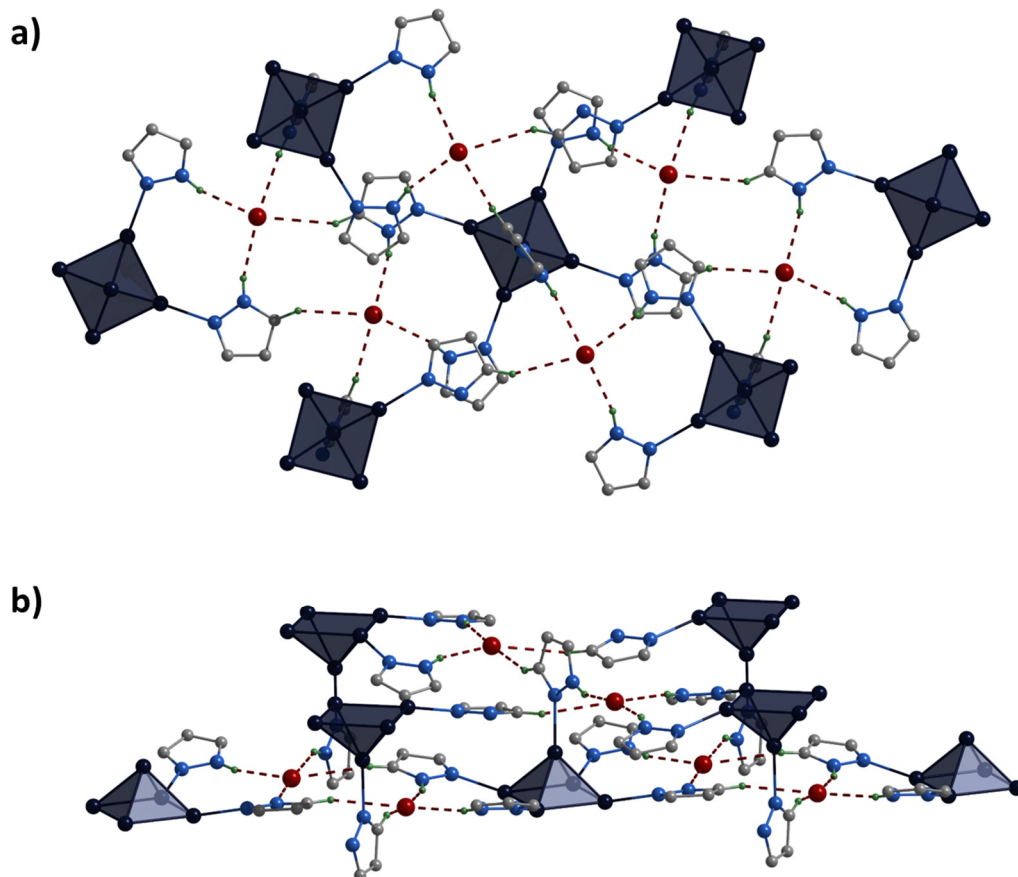

**Figure S30.** Packing in the crystal structure of **[3]Br<sub>2</sub>·CH<sub>3</sub>CN·Et<sub>2</sub>O**. Connection of chains by hydrogen bonds between apical pyrazole ligands and Br-anions: top (a) and side (b) view. Color code: Mo – dark blue, C – gray, N – blue, Br – red, H – green, N-H···Br / C-H···Br – red. Hydrogen and sulfur atoms are omitted for clarity.

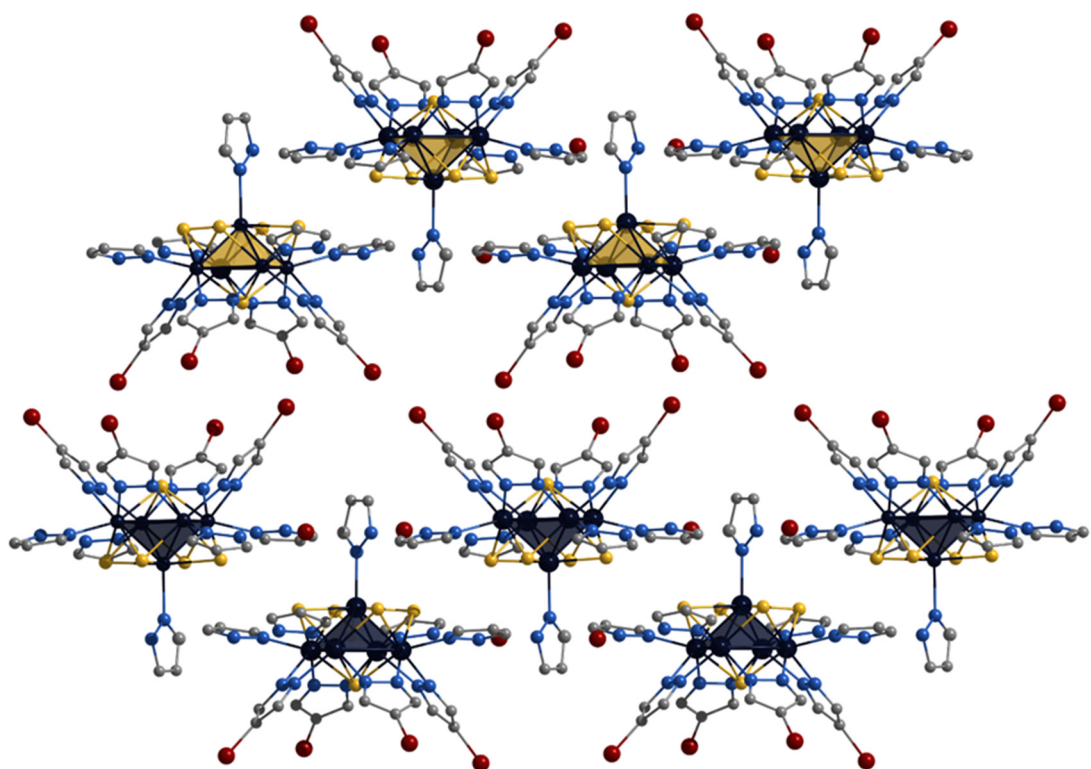

**Figure S31.** Packing of layers in the crystal structure of  $[3]\text{Br}_2 \cdot \text{CH}_3\text{CN} \cdot \text{Et}_2\text{O}$ . Color code: Mo – dark blue, C – gray, S – yellow, N – blue, Br – red. Different colors of the square pyramids indicate that the clusters belong to different layers. Hydrogen atoms are omitted for clarity.

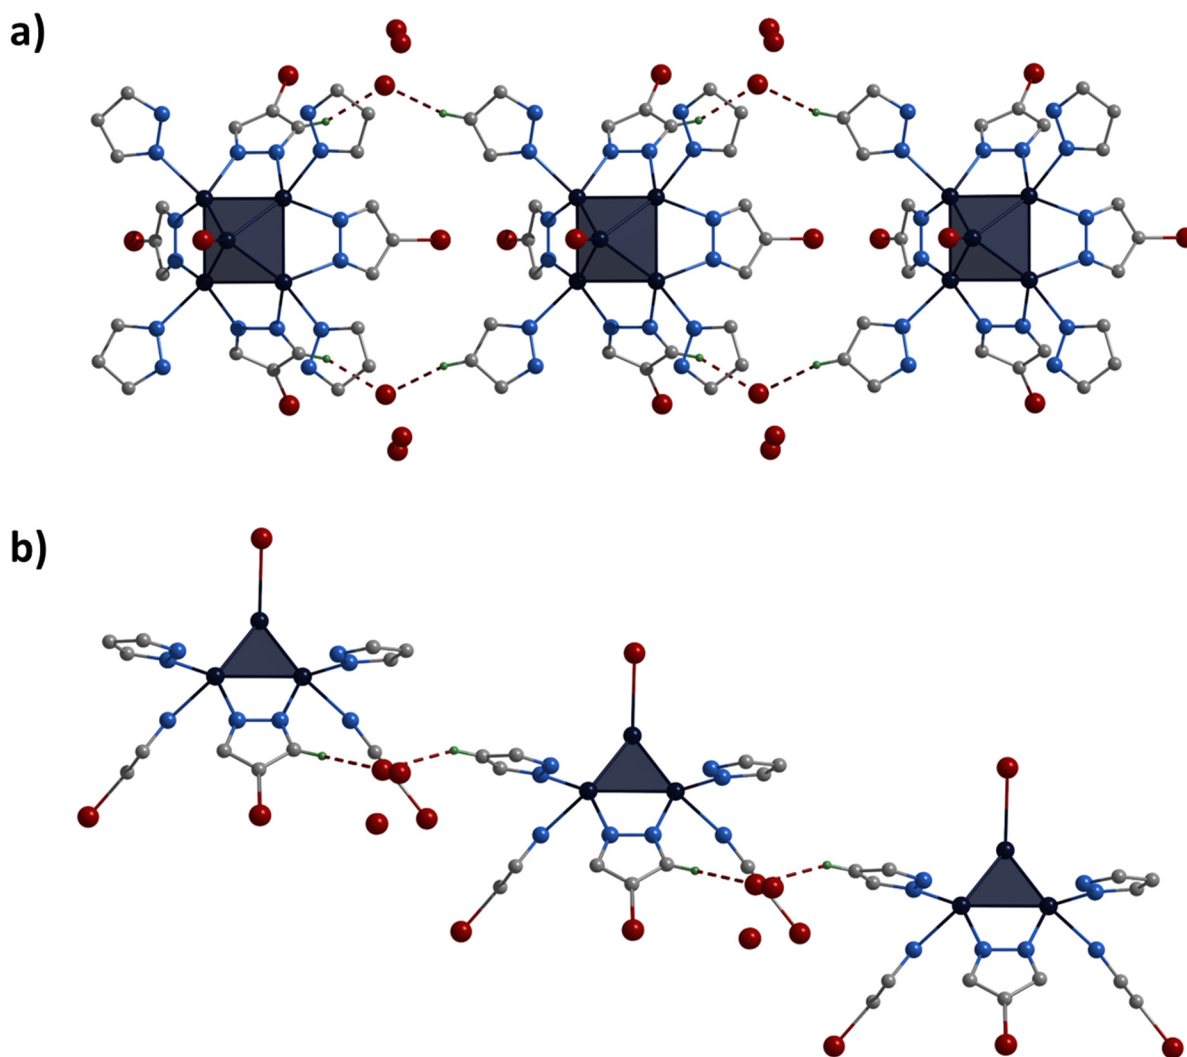

**Figure S32.** Packing in the crystal structure of **[4]Br·1.25H<sub>2</sub>O·2DMSO**. Chains formed by hydrogen bonds between basal pyrazole ligands, Br-anions and pyrazolate ligands: top (a) and side (b) view. Color code: Mo – dark blue, C – gray, N – blue, Br – red, C-H···Br – red. Hydrogen and sulfur atoms are omitted for clarity.

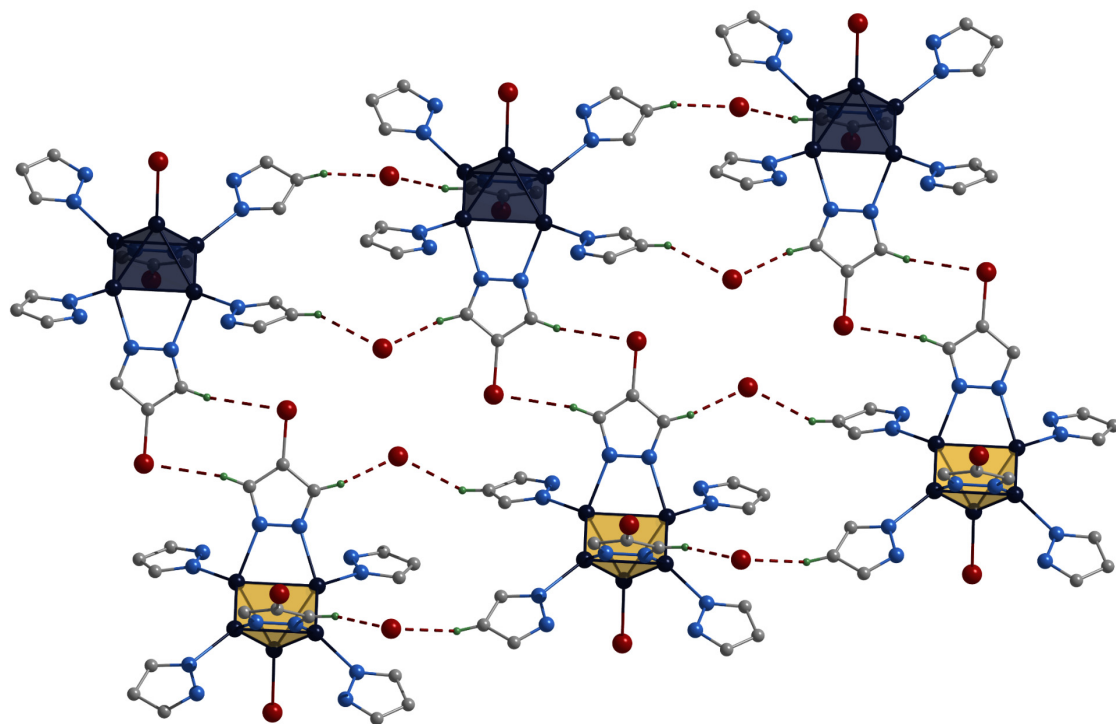

**Figure S33.** Packing in the crystal structure of **[4]Br·1.25H<sub>2</sub>O·2DMSO**. Connection of the chains by hydrogen bonds between pyrazolate ligands. Color code: Mo – dark blue, C – gray, N – blue, Br – red, C-H...Br – red. Different colors of the square pyramids indicate that the clusters belong to different chains. Hydrogen and sulfur atoms are omitted for clarity.

## EPR and DFT calculations data for [1<sup>red</sup>]Br

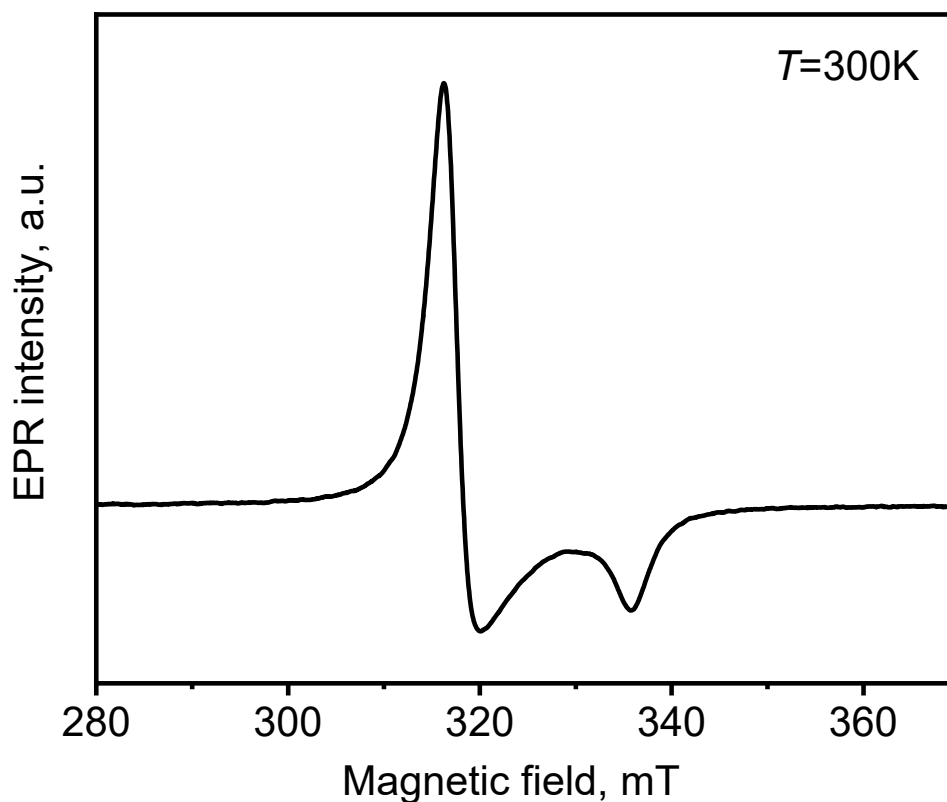

**Figure S34.** EPR spectrum measured at 300 K of [1<sup>red</sup>]Br.

**Table S1.** The EPR parameters calculated for  $[\{\text{Mo}_5(\mu_3\text{-S})_4(\mu_4\text{-S})(\mu\text{-pz})_4\}(\text{pzH})_5]^+$  cation at the different levels of theory.

|                       | ZORA-SCALAR-<br>UB3LYP/TZP                              | ZORA-SO-<br>UB3LYP/TZP                                  | Experimental                                            |
|-----------------------|---------------------------------------------------------|---------------------------------------------------------|---------------------------------------------------------|
| [1 <sup>red</sup> ]Br | $g_{xx} = 2.14,$<br>$g_{yy} = 2.12,$<br>$g_{zz} = 1.98$ | $g_{xx} = 2.14,$<br>$g_{yy} = 2.13,$<br>$g_{zz} = 1.98$ | $g_{xx} = 2.12,$<br>$g_{yy} = 2.11,$<br>$g_{zz} = 1.99$ |

## Cyclic voltammetry data

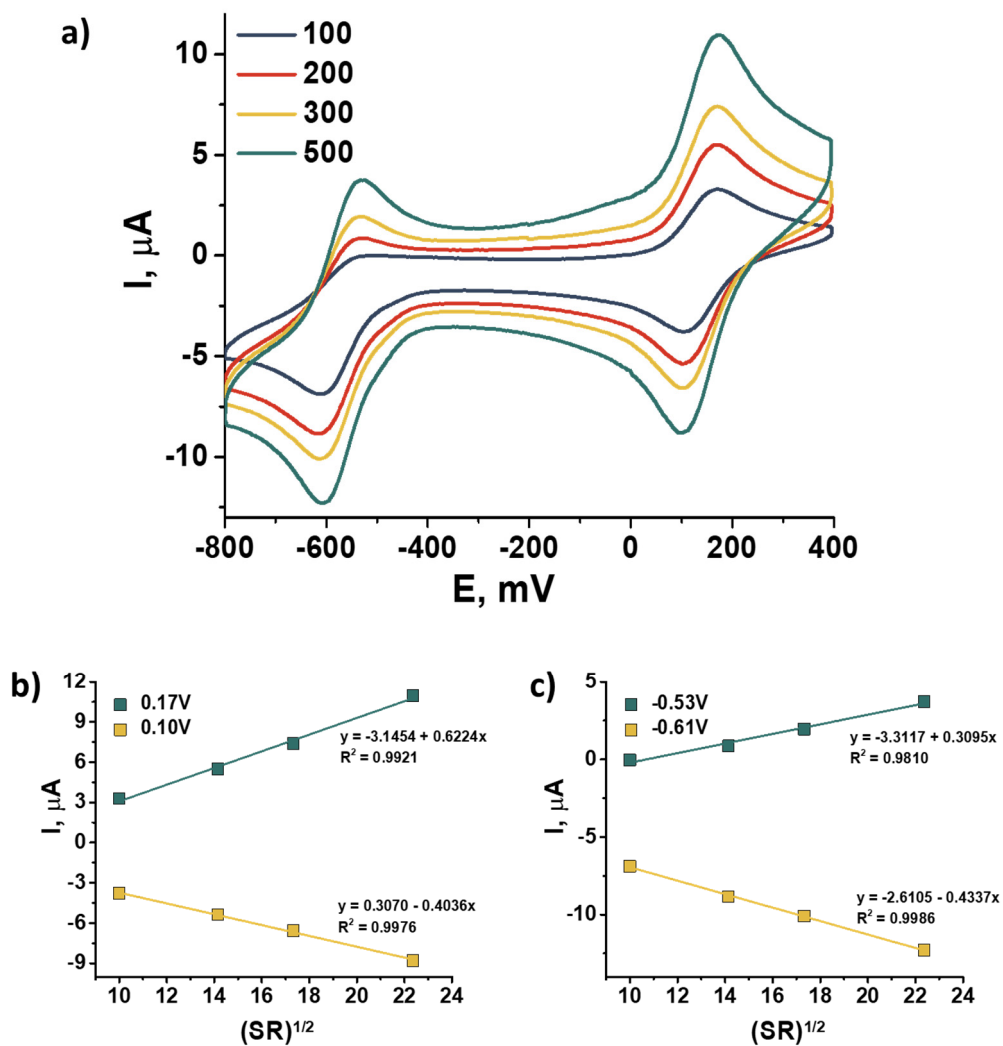

**Figure S35.** Cyclic voltammetry of the  $[1^{ox}]\text{Br}_2$  (0.5 mM) in 0.1 M  $\text{Bu}_4\text{NClO}_4$  acetonitrile solution at different scan rates (a). Linear dependence of the anodic and cathodic (b, c) peak current upon square root of the potential scan rate  $\sqrt{SR}$ ;

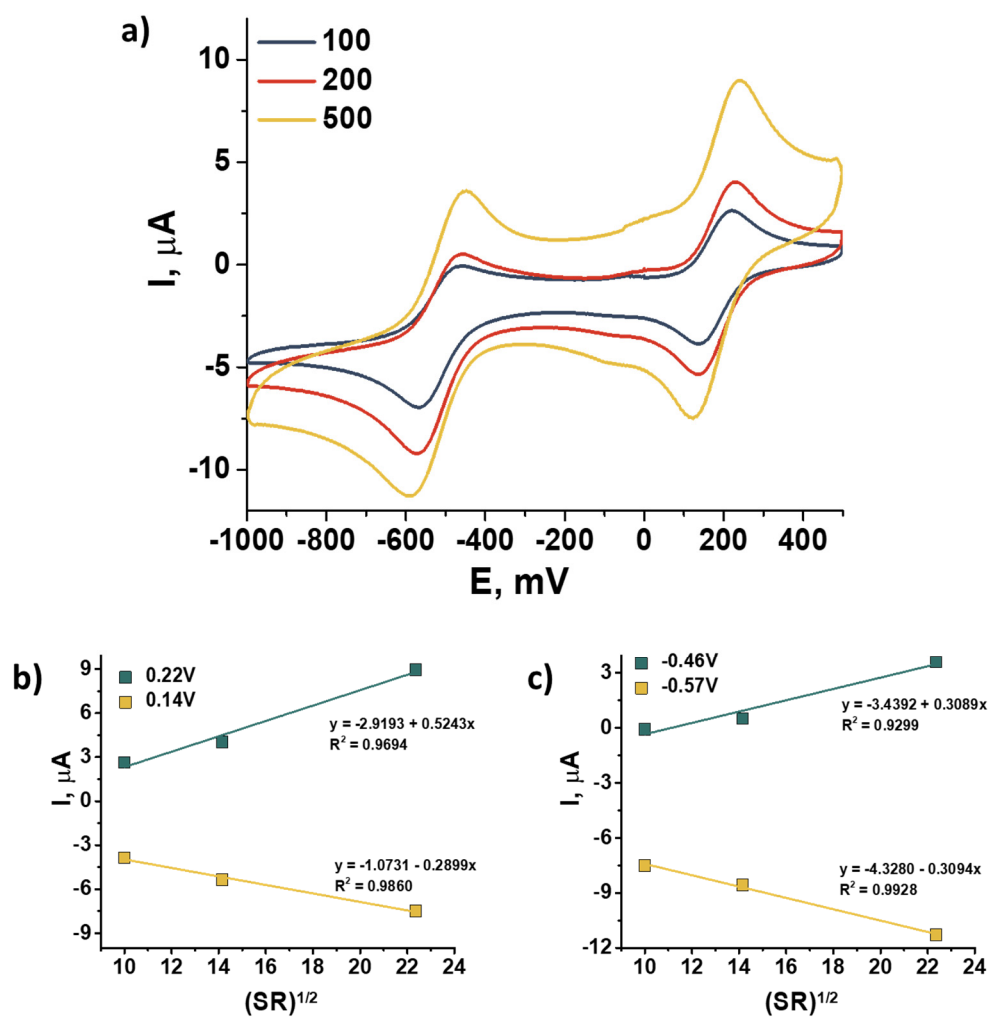

**Figure S36.** Cyclic voltammetry of the  $[1^{ox}]\text{Br}_2$  (0.5 mM) in 0.1 M  $\text{Bu}_4\text{NClO}_4$  dichloromethane solution at different scan rates (a). Linear dependence of the anodic and cathodic (b, c) peak current upon square root of the potential scan rate  $\sqrt{\text{SR}}$ ;

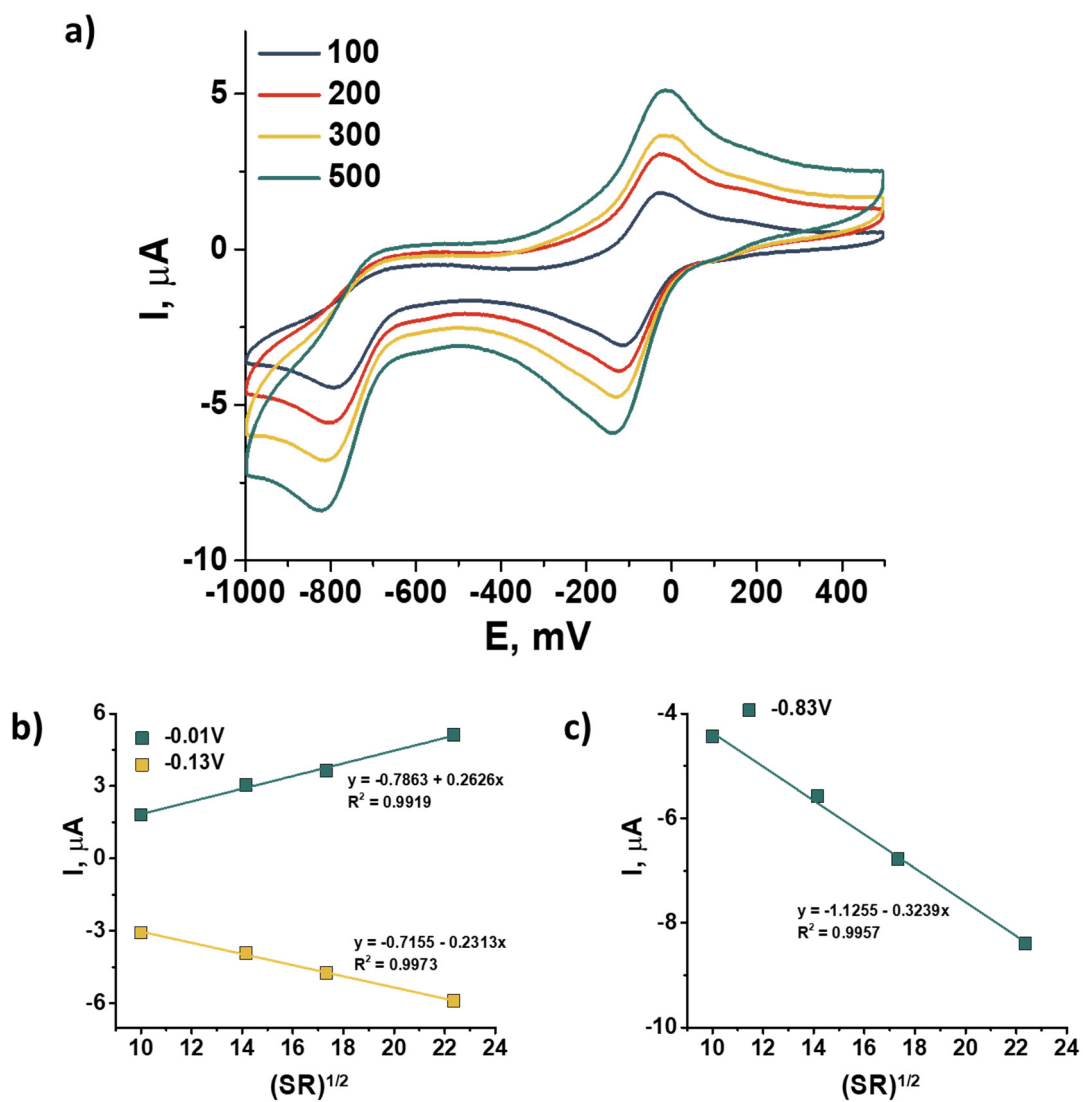

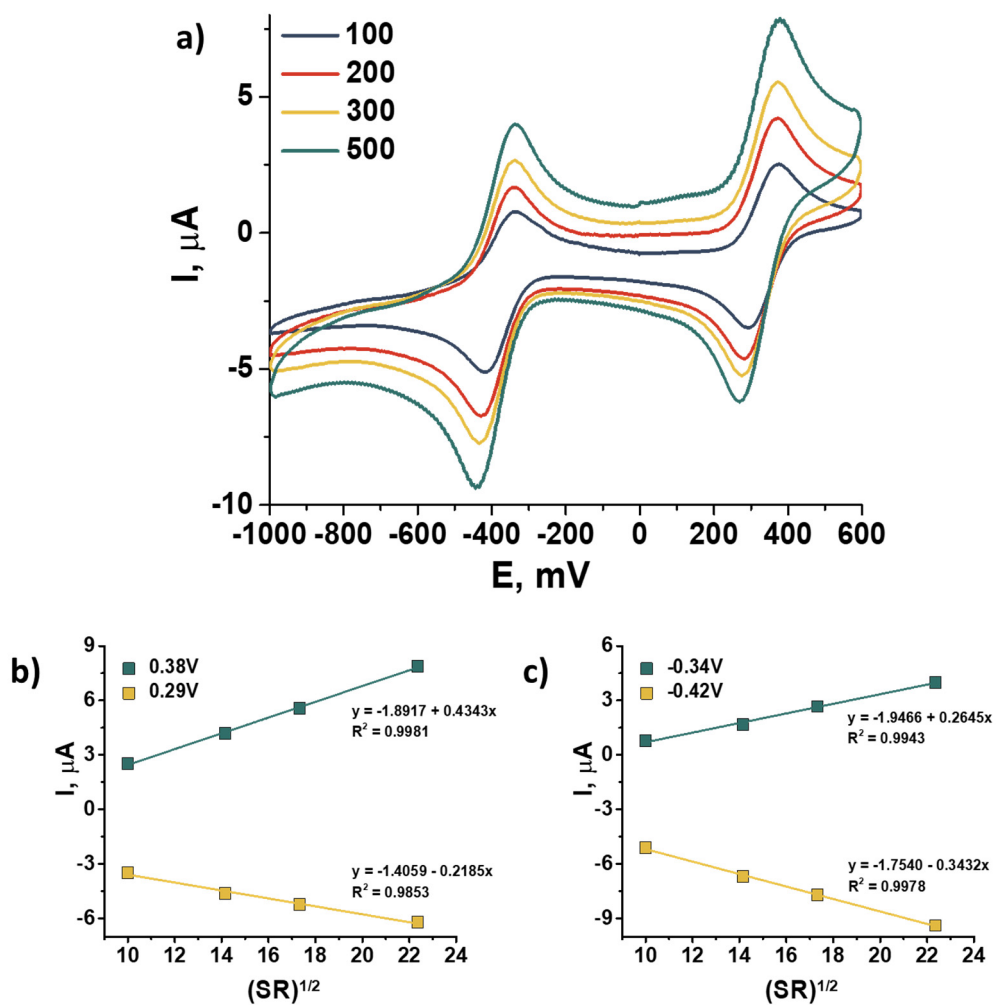

**Figure S38.** Cyclic voltammetry of the [3]Br<sub>2</sub> (0.5 mM) in 0.1 M Bu<sub>4</sub>NClO<sub>4</sub> dichloromethane solution at different scan rates (a). Linear dependence of the anodic and cathodic (b, c) peak current upon square root of the potential scan rate  $\sqrt{SR}$ ;

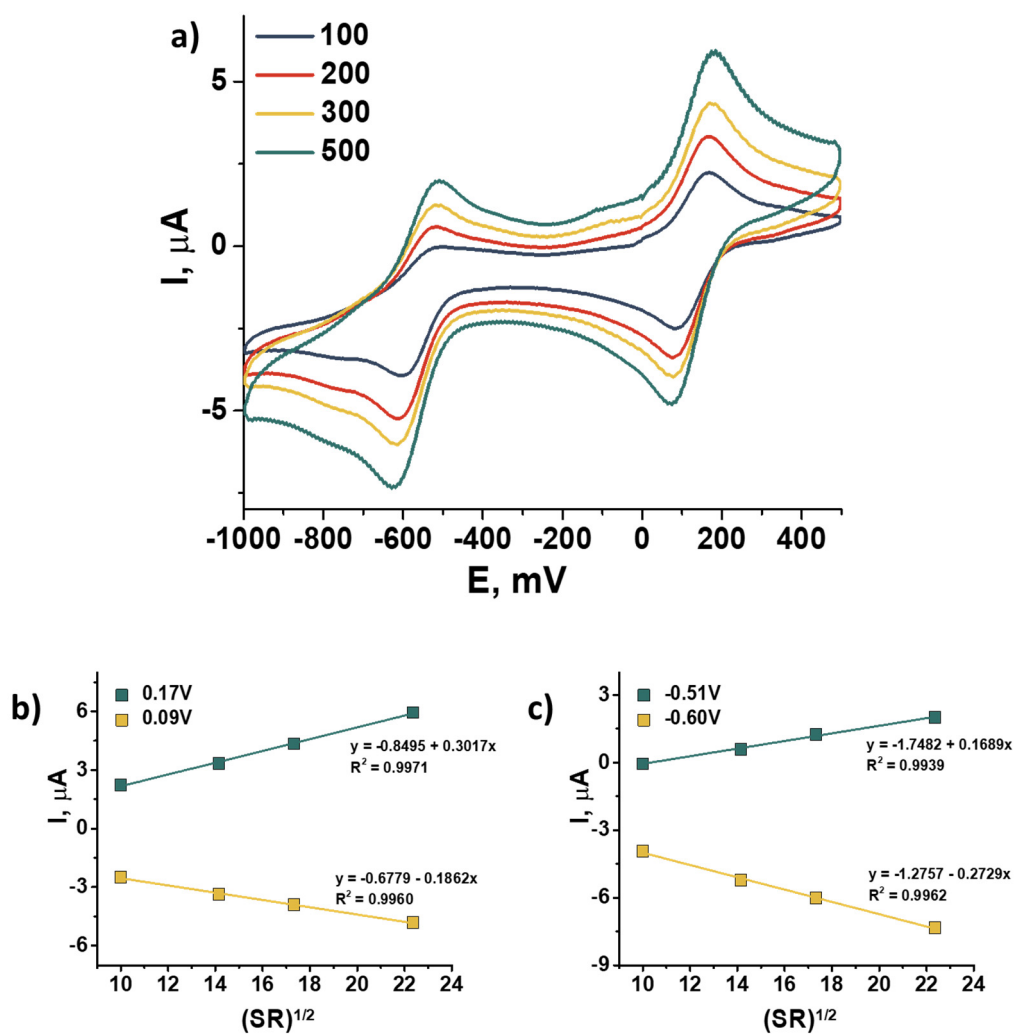

**Figure S39.** Cyclic voltammetry of the [4]Br (0.5 mM) in 0.1 M  $\text{Bu}_4\text{NClO}_4$  dichloromethane solution at different scan rates (a). Linear dependence of the anodic and cathodic (b, c) peak current upon square root of the potential scan rate  $\sqrt{SR}$ ;

## DFT calculations data

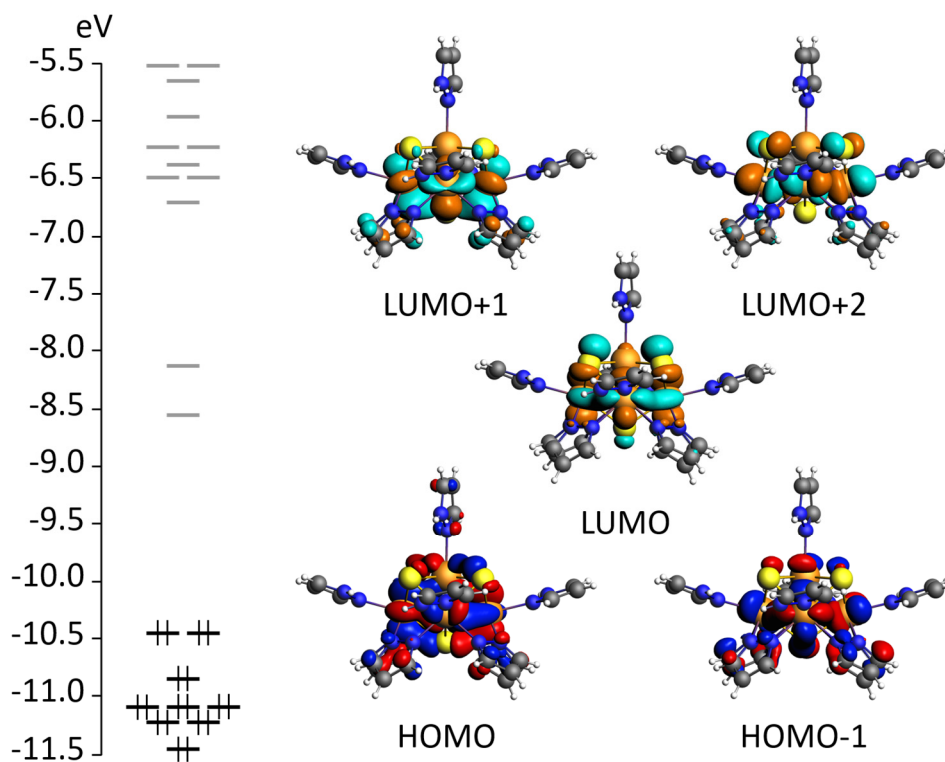

**Figure S40.** Energy levels diagram and frontier molecular orbitals of the  $[\{\text{Mo}_5(\mu_3\text{-S})_4(\mu_4\text{-S})(\mu\text{-pz})_4\}(\text{pzH})_5\}]^{2+}$  cluster.

**Table S2.** Orbital energies, symmetry of molecular orbitals and percentage contributions from the metal atoms, sulfur ligands and pzH molecules for the  $[\{\text{Mo}_5(\mu_4\text{-S})(\mu_3\text{-S})_4(\mu\text{-pz})_4\}(\text{pzH})_5]^{2+}$  cluster.

| MO           | Energy (eV) | Mo <sub>5</sub> | μ <sub>4</sub> -S | μ <sub>3</sub> -S | μ-pz  | Outer pz |
|--------------|-------------|-----------------|-------------------|-------------------|-------|----------|
| 307 (LUMO+2) | -6.713      | 80.54           | -                 | 19.46             | -     | -        |
| 306 (LUMO+1) | -8.132      | 78.95           | 1.76              | 7.51              | 11.78 | -        |
| 305 (LUMO)   | -8.559      | 72.37           | 2.58              | 25.04             | -     | -        |
| 304 (HOMO)   | -10.454     | 78.47           | 5.41              | 8.16              | 6.48  | 1.48     |
| 303 (HOMO-1) | -10.517     | 84.10           | 5.43              | 3.04              | 7.44  | -        |
| 302 (HOMO-2) | -10.845     | 82.62           | -                 | 12.51             | -     | 4.87     |

## UV-vis-NIR absorption data

**Table S3.** Main absorption bands ( $\lambda$ , nm) and corresponding extinction coefficients ( $\epsilon$ , L·mol<sup>-1</sup>·mm<sup>-1</sup>) in UV-vis-NIR absorption spectra.

| Compound                          | Solvent      | 1 <sup>st</sup> band<br>$\lambda / \epsilon$ | 2 <sup>nd</sup> band<br>$\lambda / \epsilon$ | 3 <sup>rd</sup> band<br>$\lambda / \epsilon$ |
|-----------------------------------|--------------|----------------------------------------------|----------------------------------------------|----------------------------------------------|
| [1 <sup>red</sup> ]Br             | Acetonitrile | 402 / 555                                    | 660 / 260                                    | –                                            |
| [1 <sup>ox</sup> ]Br <sub>2</sub> | Acetonitrile | 420 / 635                                    | 640 / 195                                    | 798 / 295                                    |
| [2]Br                             | Acetonitrile | 434 / 550                                    | 652 / 230                                    | 878 / 180                                    |
| [3]Br <sub>2</sub>                | Acetonitrile | 432 / 650                                    | 606 / 290                                    | 808 / 305                                    |
| [4]Br                             | DMSO         | 444 / 620                                    | 664 / 310                                    | 888 / 200                                    |

## IR spectra

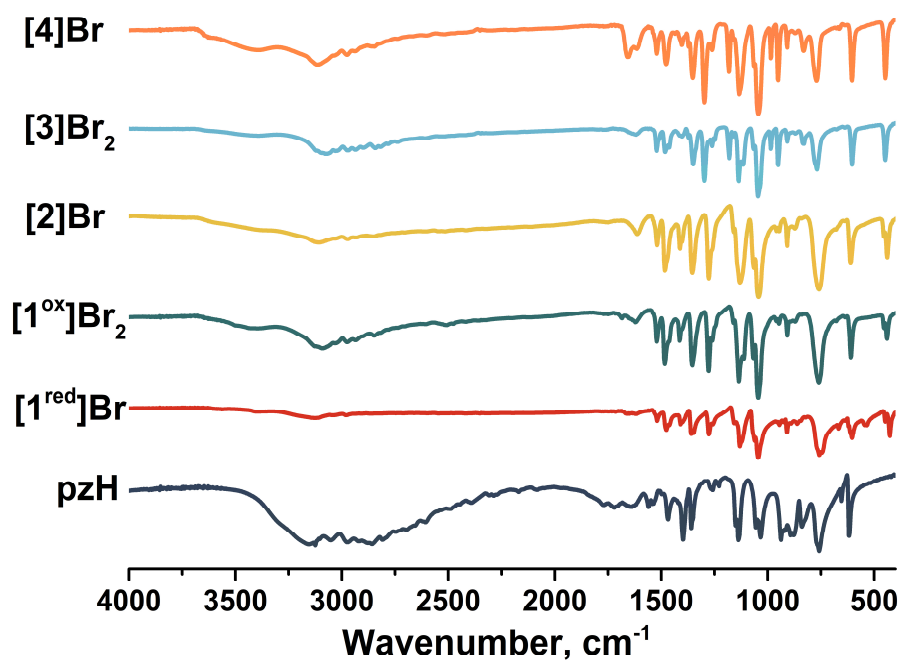

Figure S41. FTIR spectra of cluster obtained in comparison with pyrazole.

## Thermogravimetric analysis

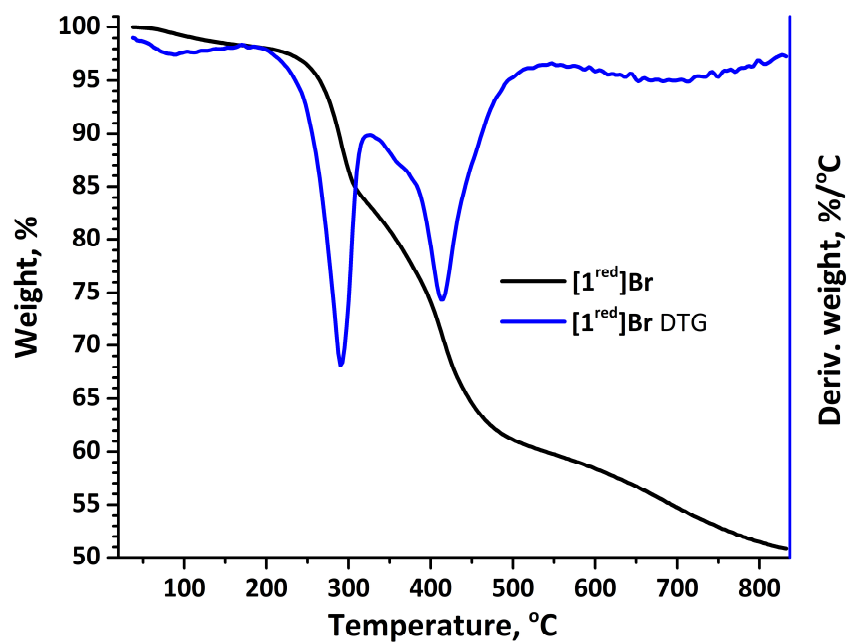

Figure S42. TGA and DTG curves of  $[1^{\text{red}}]\text{Br}$ . Heating rates of  $10\text{ }^{\circ}\text{C}\cdot\text{min}^{-1}$ .

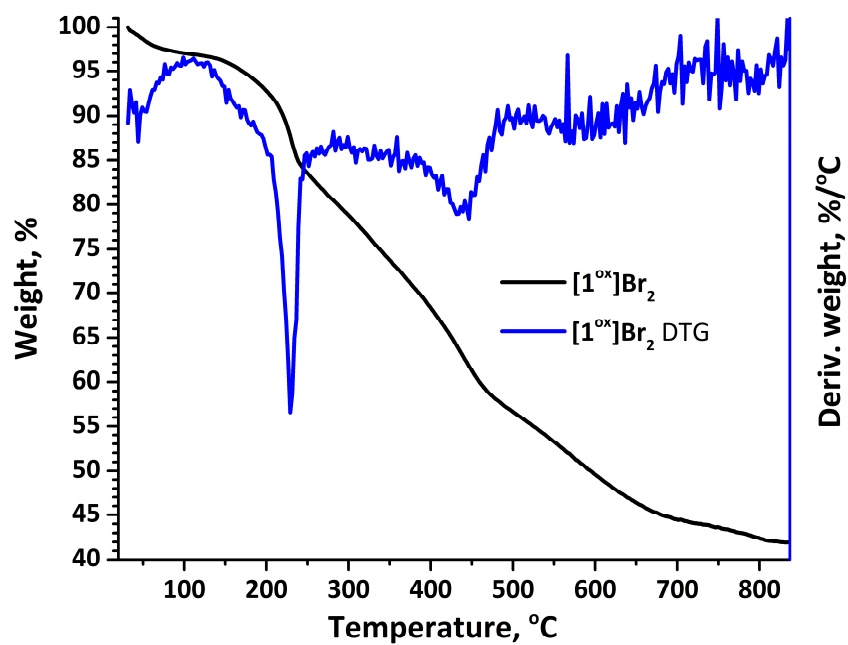

Figure S43. TGA and DTG curves of  $[1^{\text{ox}}]\text{Br}_2$ . Heating rates of  $10\text{ }^{\circ}\text{C}\cdot\text{min}^{-1}$ .

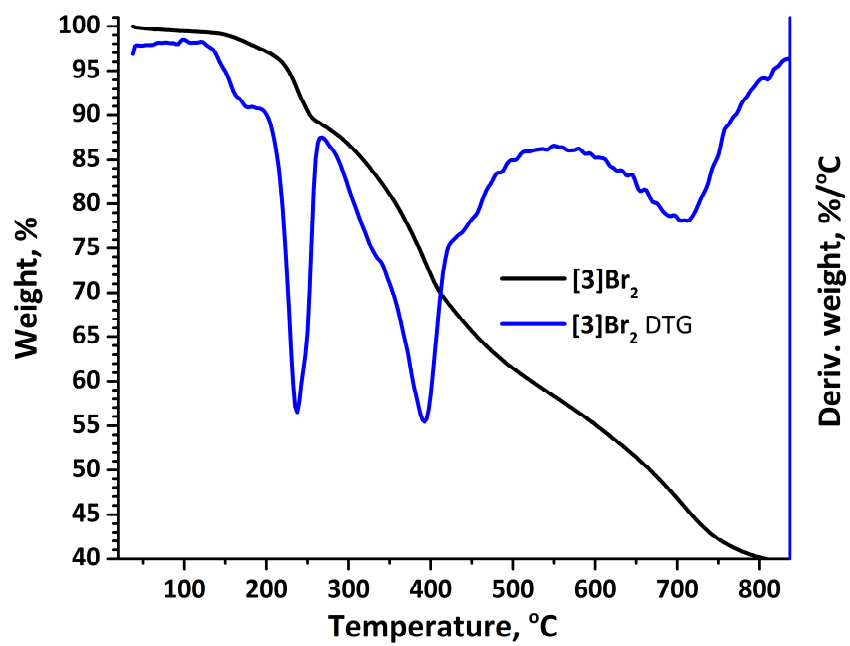

**Figure S44.** TGA and DTG curves of  $[3]Br_2$ . Heating rates of  $10\text{ }^{\circ}\text{C}\cdot\text{min}^{-1}$ .

## X-ray powder diffraction analysis of reaction mixture

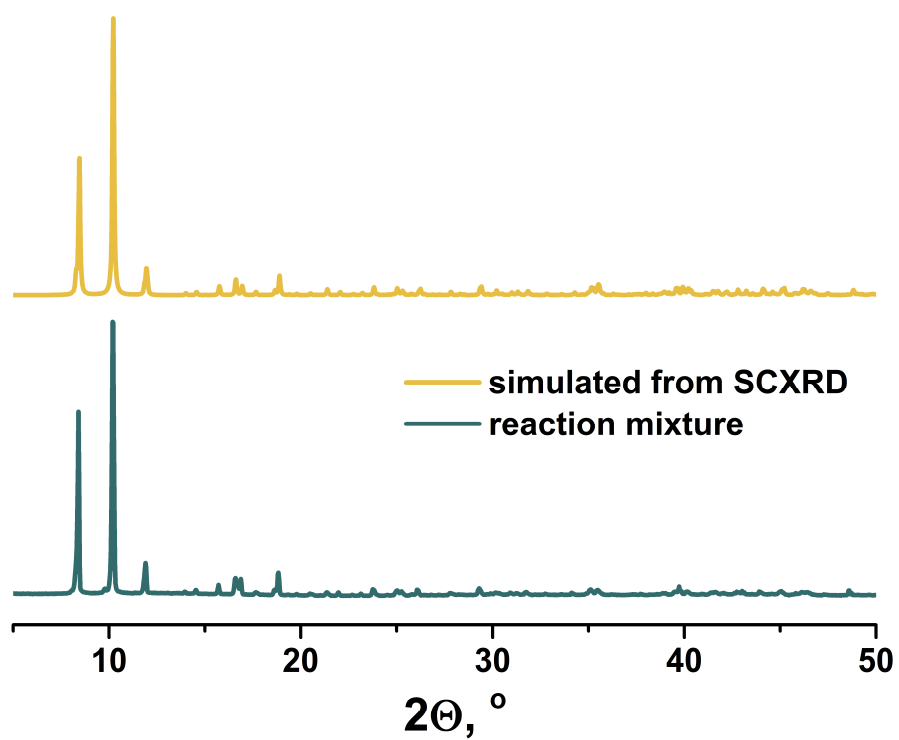

**Figure S45.** XRPD pattern of reaction mixture in comparison with calculated one from the SCXRD data for  $[1^{\text{red}}]\text{Br}$ .

## Crystal structure data

**Table S4.** Selected crystallographic parameters of the single-crystal X-ray diffraction structural analysis for  $[\{\text{Mo}_5(\mu_3\text{-S})_4(\mu_4\text{-S})(\mu\text{-pz})_4\}(\text{pzH})_5]\text{Br}\cdot\text{pzH}\cdot\text{H}_2\text{O}$  (**[1<sup>red</sup>]Br**),  $[\{\text{Mo}_5(\mu_3\text{-S})_4(\mu_4\text{-S})(\mu\text{-pz})_4\}(\text{pzH})_5][\text{Mo}_6\text{I}_{14}]\cdot 4\text{CH}_3\text{CN}$  (**[1<sup>ox</sup>][Mo<sub>6</sub>I<sub>14</sub>]**),  $[\{\text{Mo}_5(\mu_3\text{-S})_4(\mu_4\text{-S})(\mu\text{-pz})_4\}(\text{pzH})_5]\text{Br}\cdot 2.5\text{H}_2\text{O}\cdot 0.5\text{DMF}$  (**[2]Br**),  $[\{\text{Mo}_5(\mu_3\text{-S})_4(\mu_4\text{-S})(\mu\text{-Br-pz})_4\}(\text{pzH})_5]\text{Br}_2\cdot\text{CH}_3\text{CN}\cdot\text{Et}_2\text{O}$  (**[3]Br<sub>2</sub>**),  $[\{\text{Mo}_5(\mu_3\text{-S})_4(\mu_4\text{-S})(\mu\text{-4-Br-pz})_4\}(\text{pzH})_5]\text{Br}\cdot 1.25\text{H}_2\text{O}\cdot 2\text{DMSO}$  (**[4]Br**).

| Compound                                                                             | <b>[1<sup>red</sup>]Br</b>                                                         | <b>[1<sup>ox</sup>][Mo<sub>6</sub>I<sub>14</sub>]</b>                                           | <b>[2]Br</b>                                                                            | <b>[3]Br<sub>2</sub></b>                                                                       | <b>[4]Br</b>                                                                                        |
|--------------------------------------------------------------------------------------|------------------------------------------------------------------------------------|-------------------------------------------------------------------------------------------------|-----------------------------------------------------------------------------------------|------------------------------------------------------------------------------------------------|-----------------------------------------------------------------------------------------------------|
| Empirical formula                                                                    | C <sub>30</sub> H <sub>38</sub> BrMo <sub>5</sub> N <sub>20</sub> O <sub>5</sub> S | C <sub>35</sub> H <sub>44</sub> I <sub>14</sub> Mo <sub>11</sub> N <sub>22</sub> S <sub>5</sub> | C <sub>25.5</sub> H <sub>36.5</sub> Br <sub>2</sub> Mo <sub>5</sub> N <sub>16.5</sub> O | C <sub>33</sub> H <sub>41</sub> Br <sub>6</sub> Mo <sub>5</sub> N <sub>19</sub> O <sub>5</sub> | C <sub>28</sub> H <sub>36.5</sub> Br <sub>6</sub> Mo <sub>5</sub> N <sub>16</sub> O <sub>3.25</sub> |
| Formula weight                                                                       | 1414.71                                                                            | 3765.16                                                                                         | 1422.03                                                                                 | 1839.31                                                                                        | 1832.81                                                                                             |
| Temperature, K                                                                       | 150(2)                                                                             | 150(2)                                                                                          | 150(2)                                                                                  | 150(2)                                                                                         | 150(2)                                                                                              |
| Crystal system                                                                       | Orthorhombic                                                                       | Monoclinic                                                                                      | Monoclinic                                                                              | Monoclinic                                                                                     | Monoclinic                                                                                          |
| Space group                                                                          | <i>P</i> ccn                                                                       | <i>C</i> 2/c                                                                                    | <i>C</i> 2                                                                              | <i>P</i> 2 <sub>1</sub> /n                                                                     | <i>P</i> 2 <sub>1</sub> /m                                                                          |
| <i>a</i> , Å                                                                         | 14.7541(3)                                                                         | 15.4321(9)                                                                                      | 14.6680(16)                                                                             | 12.1687(5)                                                                                     | 12.4399(4)                                                                                          |
| <i>b</i> , Å                                                                         | 14.8128(5)                                                                         | 15.6714(9)                                                                                      | 23.7909(16)                                                                             | 15.4833(6)                                                                                     | 20.9936(7)                                                                                          |
| <i>c</i> , Å                                                                         | 21.3266(7)                                                                         | 33.2330(17)                                                                                     | 13.6723(11)                                                                             | 30.8952(12)                                                                                    | 13.9325(5)                                                                                          |
| $\alpha$ , °                                                                         | 90                                                                                 | 90                                                                                              | 90                                                                                      | 90                                                                                             | 90                                                                                                  |
| $\beta$ , °                                                                          | 90                                                                                 | 92.317(2)                                                                                       | 90.281(4)                                                                               | 94.8520(10)                                                                                    | 107.891(2)                                                                                          |
| $\gamma$ , °                                                                         | 90                                                                                 | 90                                                                                              | 90                                                                                      | 90                                                                                             | 90                                                                                                  |
| <i>V</i> , Å <sup>3</sup>                                                            | 4660.9(2)                                                                          | 8030.6(8)                                                                                       | 4771.1(7)                                                                               | 5800.2(4)                                                                                      | 3462.6(2)                                                                                           |
| <i>Z</i>                                                                             | 4                                                                                  | 4                                                                                               | 4                                                                                       | 4                                                                                              | 2                                                                                                   |
| $\rho_{\text{calc}}$ , g/cm <sup>3</sup>                                             | 2.016                                                                              | 3.114                                                                                           | 1.980                                                                                   | 2.106                                                                                          | 1.758                                                                                               |
| $\mu$ , mm <sup>-1</sup>                                                             | 2.442                                                                              | 7.209                                                                                           | 3.219                                                                                   | 5.412                                                                                          | 4.591                                                                                               |
| <i>F</i> (000)                                                                       | 2764                                                                               | 6768                                                                                            | 2756                                                                                    | 3520                                                                                           | 1749                                                                                                |
| Crystal size                                                                         | 0.18 × 0.14 × 0.08                                                                 | 0.06 × 0.02 × 0.02                                                                              | 0.115 × 0.10 × 0.006                                                                    | 0.05 × 0.04 × 0.004                                                                            | 0.16 × 0.09 × 0.065                                                                                 |
| 2 $\theta$ range for data collection, °                                              | 2.170 to 27.507                                                                    | 1.935 to 27.516                                                                                 | 2.204 to 27.540                                                                         | 1.472 to 30.560                                                                                | 1.536 to 28.733                                                                                     |
| Index ranges                                                                         | −11 ≤ <i>h</i> ≤ 18                                                                | −20 ≤ <i>h</i> ≤ 20                                                                             | −19 ≤ <i>h</i> ≤ 17                                                                     | −17 ≤ <i>h</i> ≤ 17                                                                            | −16 ≤ <i>h</i> ≤ 16                                                                                 |
|                                                                                      | −19 ≤ <i>k</i> ≤ 19                                                                | −20 ≤ <i>k</i> ≤ 20                                                                             | −30 ≤ <i>k</i> ≤ 30                                                                     | −22 ≤ <i>k</i> ≤ 22                                                                            | −28 ≤ <i>k</i> ≤ 28                                                                                 |
|                                                                                      | −27 ≤ <i>l</i> ≤ 27                                                                | −42 ≤ <i>l</i> ≤ 43                                                                             | −17 ≤ <i>l</i> ≤ 17                                                                     | −44 ≤ <i>l</i> ≤ 43                                                                            | −18 ≤ <i>l</i> ≤ 18                                                                                 |
| Reflections collected                                                                | 34739                                                                              | 47817                                                                                           | 23934                                                                                   | 74634                                                                                          | 40306                                                                                               |
| Independent reflections                                                              | 5324 [ <i>R</i> <sub>int</sub> = 0.0571]                                           | 9222 [ <i>R</i> <sub>int</sub> = 0.0547]                                                        | 10881 [ <i>R</i> <sub>int</sub> = 0.0604]                                               | 17726 [ <i>R</i> <sub>int</sub> = 0.1217]                                                      | 9171 [ <i>R</i> <sub>int</sub> = 0.0496]                                                            |
| Data/restraints/parameters                                                           | 5324/27/305                                                                        | 9222/12/396                                                                                     | 10881/61/580                                                                            | 17726/0/626                                                                                    | 9171/18/358                                                                                         |
| Goodness-of-fit on <i>F</i> <sup>2</sup>                                             | 1.022                                                                              | 1.009                                                                                           | 1.075                                                                                   | 1.029                                                                                          | 1.050                                                                                               |
| <i>R</i> <sub>1</sub> / <i>wR</i> <sub>2</sub> ( <i>I</i> > 2 $\sigma$ ( <i>I</i> )) | 0.0294/0.0586                                                                      | 0.0301/0.0551                                                                                   | 0.0600/0.1559                                                                           | 0.0778/0.1774                                                                                  | 0.0733/0.2064                                                                                       |
| <i>R</i> <sub>1</sub> / <i>wR</i> <sub>1</sub> (all data)                            | 0.0412/0.0611                                                                      | 0.0465/0.0596                                                                                   | 0.0912/0.1707                                                                           | 0.1485/0.1977                                                                                  | 0.0972/0.2169                                                                                       |
| $\Delta\rho_{\text{max}}/\Delta\rho_{\text{min}}$ (e <sup>−</sup> Å <sup>−3</sup> )  | 1.135/−0.789                                                                       | 0.935/−0.930                                                                                    | 1.914/−1.316                                                                            | 2.246/−1.163                                                                                   | 2.150/−1.054                                                                                        |
